# Supplementary material
Source: PubMed Central journal article supplement (PMC9361830)
Supplement: aem.00791-22-s0001.pdf [file aem.00791-22-s0001.pdf]

## SUPPLEMENTAL INFORMATION

### **Excreted antibiotics may be key to emergence of increasingly efficient antibiotic resistance in food-animal production**

Johannetsy J. Avillan<sup>1</sup>, Parvaneh Ahmadvand<sup>2</sup>, Shao-Yeh Lu<sup>1,3</sup>, Jennifer Horton<sup>1</sup>, Jinxin Liu<sup>1,4</sup>, Eric Lofgren<sup>1</sup>, Margaret A. Davis<sup>1</sup>,  
ChulHee Kang<sup>2</sup>, and Douglas R. Call<sup>1\*</sup>

<sup>1</sup>Paul G. Allen School for Global Health, Washington State University, Pullman, WA 99164, USA; <sup>2</sup>Department of Chemistry, Washington State University, Pullman, WA 99164, USA; <sup>3</sup>U.S. Department of Agriculture, Agricultural Research Service, National Center for Agricultural Utilization Research, Peoria, IL, 61604, USA; <sup>4</sup>Laboratory of Gastrointestinal Microbiology, College of Animal Science and Technology, Nanjing Agricultural University, Nanjing, China.

**Table S1. Bacterial strains and plasmids used in this study.**

| Strains                                                                                   | Relevant genotype or phenotype <sup>a</sup>                                                                                                                                                                                      | Reference or source <sup>b</sup> |
|-------------------------------------------------------------------------------------------|----------------------------------------------------------------------------------------------------------------------------------------------------------------------------------------------------------------------------------|----------------------------------|
| <b><i>Escherichia coli</i></b>                                                            |                                                                                                                                                                                                                                  |                                  |
| <b>DH10B</b>                                                                              | F- <i>mcrA</i> Δ( <i>mrr-hsdRMS-mcrBC</i> ) 80lacZΔM15 ΔlacX74 recA1 endA1 araD139 Δ( <i>ara-leu</i> )7697 galU galK λ <sup>-</sup> rpsL nupG                                                                                    | Thermo Fisher                    |
| DH10B/ pMMB207Δ <i>bla</i> <sub>TEM-1</sub>                                               | Str <sup>r</sup> Cm <sup>r</sup> ; DH10B with pMMB207 vector and Tem-1 deletion (no-insert control)                                                                                                                              |                                  |
| DH10B/ pMMB207Δ <i>bla</i> <sub>TEM-1</sub> :: <i>bla</i> <sub>CMY-2</sub>                | Str <sup>r</sup> Cm <sup>r</sup> Amp <sup>r</sup> ; DH10B with pMMB207 vector containing Tem-1 deletion complemented with <i>bla</i> <sub>CMY-2</sub> and its native promoter (-574)                                             | This study                       |
| DH10B/ pMMB207Δ <i>bla</i> <sub>TEM-1</sub> :: <i>bla</i> <sub>CTX-M-15</sub>             | Str <sup>r</sup> Cm <sup>r</sup> Amp <sup>r</sup> ; DH10B with pMMB207 vector containing Tem-1 deletion complemented with <i>bla</i> <sub>CTX-M-15</sub> and its native promoter (-506)                                          | This study                       |
| DH10B/ pMMB207Δ <i>bla</i> <sub>TEM-1</sub> :: <i>bla</i> <sub>KPC-3</sub>                | Str <sup>r</sup> Cm <sup>r</sup> Amp <sup>r</sup> ; DH10B with pMMB207 vector containing Tem-1 deletion complemented with <i>bla</i> <sub>KPC-3</sub> and its native promoter (-377)                                             | This study                       |
| DH10B/ pMMB207Δ <i>bla</i> <sub>TEM-1</sub> :: <i>bla</i> <sub>CMY-2</sub> -Flagtagged    | Str <sup>r</sup> Cm <sup>r</sup> Amp <sup>r</sup> ; DH10B with pMMB207 vector containing Tem-1 deletion complemented with <i>bla</i> <sub>CMY-2</sub> , its native promoter (-574) and flag-tag after signal peptide sequence    | This study                       |
| DH10B/ pMMB207Δ <i>bla</i> <sub>TEM-1</sub> :: <i>bla</i> <sub>CTX-M-15</sub> -Flagtagged | Str <sup>r</sup> Cm <sup>r</sup> Amp <sup>r</sup> ; DH10B with pMMB207 vector containing Tem-1 deletion complemented with <i>bla</i> <sub>CTX-M-15</sub> , its native promoter (-506) and flag-tag after signal peptide sequence | This study                       |
| DH10B/ pMMB207Δ <i>bla</i> <sub>TEM-1</sub> :: <i>bla</i> <sub>KPC-3</sub> -Flagtagged    | Str <sup>r</sup> Cm <sup>r</sup> Amp <sup>r</sup> ; DH10B with pMMB207 vector containing Tem-1 deletion complemented with <i>bla</i> <sub>KPC-3</sub> , its native promoter (-377) and flag-tag after signal peptide sequence    | This study                       |
| <b>Top10</b>                                                                              | F <sup>-</sup> <i>mcrA</i> Δ( <i>mrr-hsdRMS-mcrBC</i> ) φ80lacZΔM15 ΔlacX74 recA1 araD139 Δ( <i>ara-leu</i> )7697 galU galK λ <sup>-</sup> rpsL(Str <sup>R</sup> ) endA1 nupG                                                    | Invitrogen                       |
| Top10/pET200:: <i>bla</i> <sub>CMY-2</sub>                                                | Str <sup>r</sup> Kan <sup>r</sup> Amp <sup>r</sup> ; Top10 with the expression vector pET200 complemented with <i>bla</i> <sub>CMY-2</sub>                                                                                       | This study                       |
| Top10/pET200:: <i>bla</i> <sub>CTX-M-15</sub>                                             | Str <sup>r</sup> Kan <sup>r</sup> Amp <sup>r</sup> ; Top10 with the expression vector pET200 complemented with <i>bla</i> <sub>CTX-M-15</sub>                                                                                    | This study                       |
| Top10/pET200:: <i>bla</i> <sub>KPC-3</sub>                                                | Str <sup>r</sup> Kan <sup>r</sup> Amp <sup>r</sup> ; Top10 with the expression vector pET200 complemented with <i>bla</i> <sub>KPC-3</sub>                                                                                       | This study                       |
| <b>BL21 (DE3)</b>                                                                         | F <sup>-</sup> <i>ompT hsdSB</i> (rB <sup>-</sup> , mB <sup>-</sup> ) gal dem (DE3)                                                                                                                                              | Invitrogen                       |
| BL21/pET200:: <i>bla</i> <sub>CMY-2</sub>                                                 | Kan <sup>r</sup> Amp <sup>r</sup> ; Top10 with the expression vector pET200 complemented with <i>bla</i> <sub>CMY-2</sub>                                                                                                        | This study                       |
| BL21/pET200:: <i>bla</i> <sub>CTX-M-15</sub>                                              | Kan <sup>r</sup> Amp <sup>r</sup> ; Top10 with the expression vector pET200 complemented with <i>bla</i> <sub>CTX-M-15</sub>                                                                                                     | This study                       |
| BL21/pET200:: <i>bla</i> <sub>KPC-3</sub>                                                 | Kan <sup>r</sup> Amp <sup>r</sup> ; Top10 with the expression vector pET200 complemented with <i>bla</i> <sub>KPC-3</sub>                                                                                                        | This study                       |
| <b>Plasmids</b>                                                                           |                                                                                                                                                                                                                                  |                                  |
| pMMB207                                                                                   | Cm <sup>r</sup> , Amp <sup>r</sup> ; RSF1010 derivative, <i>IncQ lacI<sup>q</sup> Tac oriT</i>                                                                                                                                   |                                  |

|                                                        |                                                                                                                                                                                           |                          |
|--------------------------------------------------------|-------------------------------------------------------------------------------------------------------------------------------------------------------------------------------------------|--------------------------|
| pMMB207 $\Delta$ <i>bla</i> <sub>TEM-1</sub><br>pET200 | Cm <sup>r</sup> ; pMMB207 vector with Tem-1 cassette deletion<br>Kan <sup>r</sup> ; T7 expression vector, N-terminal peptide containing the X-press epitope and the<br>6 $\times$ His tag | This study<br>Invitrogen |
|--------------------------------------------------------|-------------------------------------------------------------------------------------------------------------------------------------------------------------------------------------------|--------------------------|

---

**Wild-type bacterial strains**

---

|         |                                                            |     |
|---------|------------------------------------------------------------|-----|
| AR-0044 | <i>bla</i> <sub>CTX-M-15</sub> -positive <i>E. coli</i>    | CDC |
| AR-0081 | <i>bla</i> <sub>CMY-2</sub> -positive <i>K. pneumoniae</i> | CDC |
| AR-0114 | <i>bla</i> <sub>KPC-3</sub> -positive <i>E. coli</i>       | CDC |

---

<sup>a</sup>Amp<sup>r</sup>, ampicillin resistant; Cm<sup>r</sup>, Chloramphenicol resistant; Kan<sup>r</sup>, kanamycin resistant; Str<sup>r</sup>, streptomycin resistant; Nal<sup>r</sup>, nalidixic acid resistant.

<sup>b</sup>*E. coli* isolates AR-0044, AR-0081 and AR-0114 were obtained from the CDC and FDA antibiotic resistance isolate bank.

**Table S2. Primers used in this study.**

| Primer                                                | Sequence (5' – 3') <sup>a</sup>                  | Purpose                                                                                                                                               | Reference  |
|-------------------------------------------------------|--------------------------------------------------|-------------------------------------------------------------------------------------------------------------------------------------------------------|------------|
| <b>pMMB207 Tem-1 removal primers</b>                  |                                                  |                                                                                                                                                       |            |
| p207_InvPCR-F                                         | CAGGCATCAACCCCGTCAGTAGCTGAACAG                   | Used for knocking out Tem-1 promoter and Tem-1 gene in pMMB207                                                                                        | This study |
| p207_InvPCR-R                                         | GACGGGGTGTGATGCCTGGCAGTTTATGGCG                  | Used for knocking out Tem-1 promoter and Tem-1 gene in pMMB207                                                                                        | This study |
| p207_Tem-1_F                                          | GTATCCGCTCATGAGACAATAACCCTGATA                   | Used to confirm the deletion of Tem-1 cassette                                                                                                        | This study |
| p207_Tem-1_R                                          | GTGCACCCAACTGATCTTCAGCATC                        | Used to confirm the deletion of Tem-1 cassette                                                                                                        | This study |
| <b>Cloning of AR genes into pMMB207ΔTem-1 primers</b> |                                                  |                                                                                                                                                       |            |
| Prom+_CTXM&CMY-2                                      | ATTCGG <u>GAGCTCT</u> GGGTCATCTCTTGCTAAAGTCA     | Used for cloning of <i>bla<sub>CMY-2</sub></i> and <i>bla<sub>CTX-M-15</sub></i> with promoter region (-574 and -506 respectively) into pMMB207ΔTem-1 | This study |
| CMY-2_R                                               | ATTCGGGATCCTTATTGCAGCTTTTCAAGAATGCG              | Used for cloning of <i>bla<sub>CMY-2</sub></i> into pMMB207ΔTem-1 (includes TTA stop codon)                                                           | This study |
| CTXM-15_R                                             | ATTCGA <u>AAGCTTTT</u> TACAAACCGTCGGTGACGATTTTAG | Used for cloning of <i>bla<sub>CTX-M-15</sub></i> into pMMB207ΔTem-1 (includes TTA stop codon)                                                        | This study |
| Prom_KPC-3_F                                          | ATTCGG <u>GAGCTCG</u> TTCAGTATTACTTTGGTGATTCAG   | Used for cloning of <i>bla<sub>KPC-3</sub></i> with promoter region (-377) into pMMB207ΔTem-1                                                         | This study |
| KPC-3_R                                               | ATTCGA <u>AAGCTTTT</u> ACTGCCCGTTGACGC           | Used for cloning of <i>bla<sub>KPC-3</sub></i> into pMMB207ΔTem-1 (includes TTA stop codon)                                                           | This study |
| M13R49                                                | GAGCGGATAACAATTTACACACAGG                        | Used to verify the insertion of <i>bla<sub>CMY-2</sub></i> , <i>bla<sub>CTX-M-15</sub></i> and <i>bla<sub>KPC-3</sub></i> genes into pMMB207ΔTem-1    | Eurofins   |
| TrcHis-R                                              | CTTCTGCGTTCTGATTTAATCTG                          | Used to verify the insertion of <i>bla<sub>CMY-2</sub></i> , <i>bla<sub>CTX-M-15</sub></i> and <i>bla<sub>KPC-3</sub></i> genes into pMMB207ΔTem-1    | Eurofins   |

| <b>Protein expression constructs</b> |                                                              |                                                                                                                                                           |            |
|--------------------------------------|--------------------------------------------------------------|-----------------------------------------------------------------------------------------------------------------------------------------------------------|------------|
| P-1_Flag-CMY-2-R                     | TGTTGTTCTGTTTTTGCCTTATCGTCGTCATCCTTGTA<br>ATCGGCAGCAAATGTG   | Used for insertion of Flag-tag after signal peptide of <i>bla<sub>CMY-2</sub></i>                                                                         | This study |
| P-2_CMY-2-F                          | CTCTTTCTCCACATTTGCTGCCGATTACAAGGATGAC<br>GACGATAAGGCAAAAACAG | Used for insertion of Flag-tag after signal peptide of <i>bla<sub>CMY-2</sub></i>                                                                         | This study |
| P-1_Flag-CTXM-15-R                   | CTGTACGTCCGCCGTCTTATCGTCGTCATCCTTGTA<br>TCTTGCGCATAAC        | Used for insertion of Flag-tag after signal peptide of <i>bla<sub>CTX-M-15</sub></i>                                                                      | This study |
| P-2_CTXM-15-F                        | GCTGTATGCGCAAGATTACAAGGATGACGACGATAA<br>GACGGCGGAC           | Used for insertion of Flag-tag after signal peptide of <i>bla<sub>CTX-M-15</sub></i>                                                                      | This study |
| P1_KPC3_Flag-R                       | GACGAGGTTGGTCAGCTTATCGTCGTCATCCTTGTA<br>TCCGCGGTGGCAGAAAAG   | Used for insertion of Flag-tag after signal peptide of <i>bla<sub>KPC-3</sub></i>                                                                         | This study |
| P2_KPC3_Flag_F                       | GCTTTTCTGCCACCGCGGATTACAAGGATGACGACG<br>ATAAGCTGACCAACCTCGTC | Used for insertion of Flag-tag after signal peptide of <i>bla<sub>KPC-3</sub></i>                                                                         | This study |
| <b>Enzyme kinetics constructs</b>    |                                                              |                                                                                                                                                           |            |
| pET200-CTX-M-15-F                    | CACCATGGTTAAAAAATCACTGCGCCAGTT                               | Used for the cloning of blunt-end <i>bla<sub>CTX-M-15</sub></i> into pET200 vector for protein expression and purification (paired with primer CTXM-15_R) | This study |
| pET200-CMY-2-F                       | CACCATGATGAAAAAATCGTTATGCTGCGCTCTG                           | Used for the cloning of blunt-end <i>bla<sub>CMY-2</sub></i> into pET200 vector for protein expression and purification (paired with primer CMY-2_R)      | This study |
| pET200-KPC-3-F                       | CACCATGTCACTGTATCGCCGTCTAGTT                                 | Used for the cloning of blunt-end <i>bla<sub>KPC-3</sub></i> into pET200 vector for protein expression and purification (paired with primer KPC-3_R)      | This study |
| T7                                   | TAATACGACTCACTATAGGG                                         | Used to verify the insertion of <i>bla<sub>CMY-2</sub></i> , <i>bla<sub>CTX-M-15</sub></i> , and <i>bla<sub>KPC-3</sub></i> into pET200 vector            | Eurofins   |
| T7-term                              | CTAGTTATTGCTCAGCGGT                                          | Used to verify the insertion of <i>bla<sub>CMY-2</sub></i> , <i>bla<sub>CTX-M-15</sub></i> , and <i>bla<sub>KPC-3</sub></i> into pET200 vector            | Eurofins   |
| <b>qPCR primers</b>                  |                                                              |                                                                                                                                                           |            |
| qPCR_CMY-2_F                         | CACCCAGTCACGCAGCAAACG                                        | Used for the identification of <i>bla<sub>CMY-2</sub></i> containing clones in the competition assays                                                     | This study |
| qPCR_CMY-2_R                         | GATAGCATCGCCGCCAACAC                                         | Used for the identification of <i>bla<sub>CMY-2</sub></i> containing clones in the competition assays                                                     | This study |

|                 |                          |                                                                                                          |            |
|-----------------|--------------------------|----------------------------------------------------------------------------------------------------------|------------|
| qPCR_CTX-M-15_F | GACTGCCTGCTTCCTGGGTTG    | Used for the identification of <i>bla<sub>CTX-M-15</sub></i> containing clones in the competition assays | This study |
| qPCR_CTX-M-15_R | GGTTGAGGCTGGGTGAAGTAAGTG | Used for the identification of <i>bla<sub>CTX-M-15</sub></i> containing clones in the competition assays | This study |
| qPCR_KPC-3_F    | CTGACAACAGGCATGACGGT     | Used for the identification of <i>bla<sub>KPC-3</sub></i> containing clones in the competition assays    | This study |
| qPCR_KPC-3_R    | GATAGAGCGCATGAAGGCCG     | Used for the identification of <i>bla<sub>KPC-3</sub></i> containing clones in the competition assays    | This study |

---

<sup>a</sup>Restriction enzyme sites are underline.

**Fig. S1. Growth of *E. coli* cultures without antibiotic.** Growth curves for CTX-M-15- (green square), CMY-2- (blue circle), and KPC-3- (purple triangle) producing strains of *E. coli* and for the plasmid-only negative control strain (red diamond). Average (+/- SEM) optical density for each time point was based on 15 experiments for which **no antibiotic** was added to the media. The tables below each figure present average area under the curve (AUC) with the standard error of the mean (SEM). Subscripts represent statistically nonsignificant grouping according to one-way ANOVA and Tukey's multiple comparisons test, ( $P < 0.05$ ).

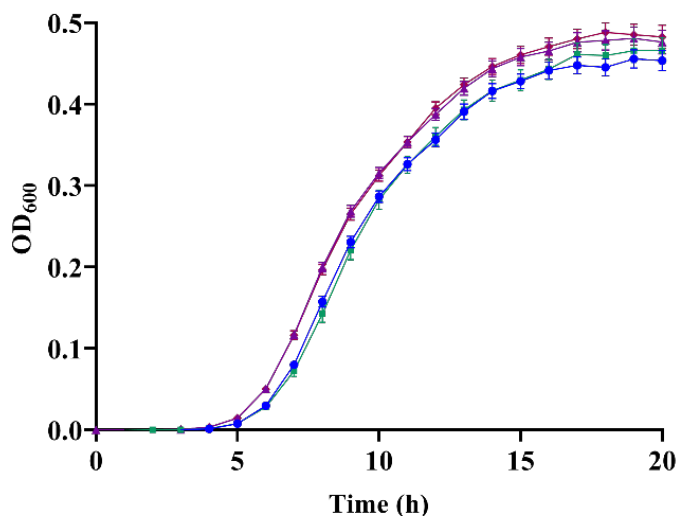

|               | CMY-2             | CTX-M-15          | KPC-3             | Control          |
|---------------|-------------------|-------------------|-------------------|------------------|
| $\bar{x}$ AUC | 4.73 <sup>a</sup> | 4.74 <sup>a</sup> | 5.17 <sup>b</sup> | 5.2 <sup>b</sup> |
| (SEM)         | (0.09)            | (0.12)            | (0.1)             | (0.1)            |

**Fig. S2. Growth of *E. coli* cultures when exposed to ampicillin.** Average growth curves (3 independent replicates, +/- SEM) for the CTX-M-15- (green square), CMY-2- (blue circle), and KPC-3- (purple triangle) producing strains of *E. coli* and for the plasmid-only negative control strain (red diamond) in the presence of 0, 8, 16, 32, 64, 128, 256, 512, 1,000, 1,500, 2,000, 2,500 or 3,000  $\mu\text{g/ml}$  of **ampicillin**. The tables below each figure present average area under the curve (AUC) with the standard error of the mean (SEM). Subscripts represent statistically nonsignificant grouping according to one-way ANOVA and Tukey's multiple comparisons test, ( $P < 0.05$ ).

**A) No antibiotic**

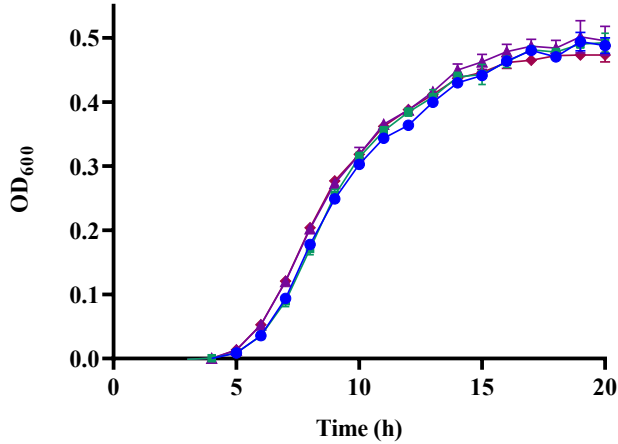

|               | CMY-2             | CTX-M-15          | KPC-3             | Control           |
|---------------|-------------------|-------------------|-------------------|-------------------|
| $\bar{x}$ AUC | 5.01 <sup>a</sup> | 5.07 <sup>a</sup> | 5.27 <sup>a</sup> | 5.16 <sup>a</sup> |
| (SEM)         | (0.03)            | (0.04)            | (0.05)            | (0.03)            |

**B) 8  $\mu\text{g/ml}$  ampicillin**

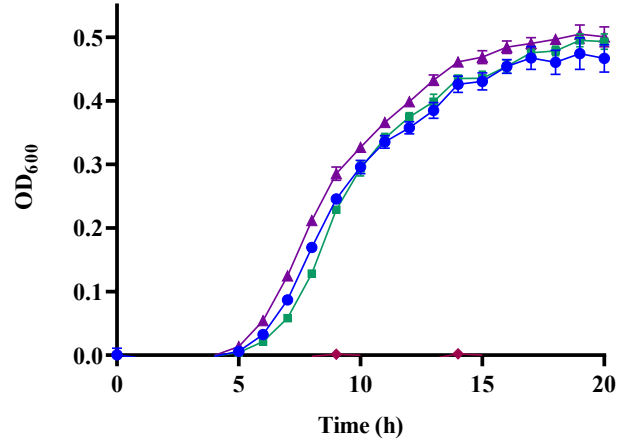

|               | CMY-2             | CTX-M-15          | KPC-3             | Control           |
|---------------|-------------------|-------------------|-------------------|-------------------|
| $\bar{x}$ AUC | 4.87 <sup>a</sup> | 4.87 <sup>a</sup> | 5.39 <sup>b</sup> | 0.05 <sup>c</sup> |
| (SEM)         | (0.06)            | (0.04)            | (0.04)            | (0.01)            |

**C) 16  $\mu\text{g/ml}$  ampicillin**

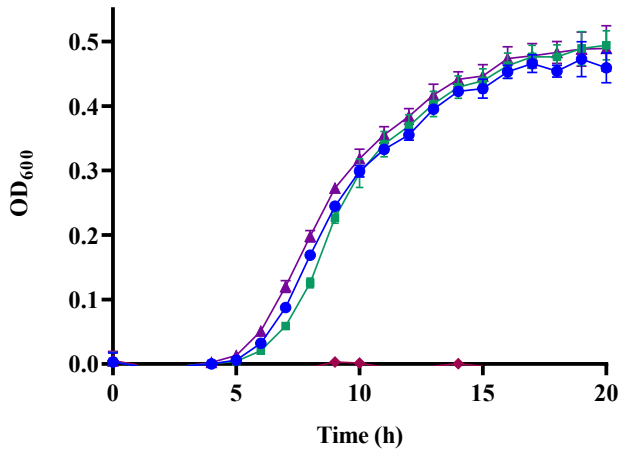

|               | CMY-2             | CTX-M-15          | KPC-3            | Control           |
|---------------|-------------------|-------------------|------------------|-------------------|
| $\bar{x}$ AUC | 4.86 <sup>a</sup> | 4.88 <sup>a</sup> | 5.2 <sup>a</sup> | 0.05 <sup>b</sup> |
| (SEM)         | (0.06)            | (0.08)            | (0.08)           | (0.01)            |

**D) 32  $\mu\text{g/ml}$  ampicillin**

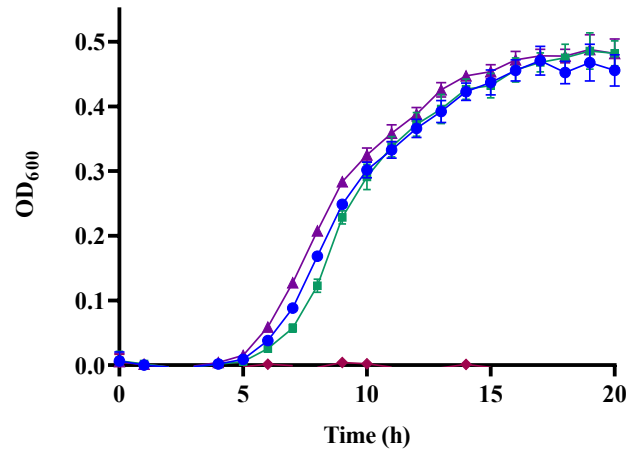

|               | CMY-2             | CTX-M-15          | KPC-3             | Control           |
|---------------|-------------------|-------------------|-------------------|-------------------|
| $\bar{x}$ AUC | 4.89 <sup>a</sup> | 4.83 <sup>a</sup> | 5.26 <sup>a</sup> | 0.04 <sup>b</sup> |
| (SEM)         | (0.07)            | (0.08)            | (0.06)            | (0.01)            |

● *bla*<sub>CMY-2</sub>   
 ■ *bla*<sub>CTX-M-15</sub>   
 ▲ *bla*<sub>KPC-3</sub>   
 ◆ pMMB207 $\Delta$ *bla*<sub>Tem-1</sub> (control)



E) 64 µg/ml ampicillin

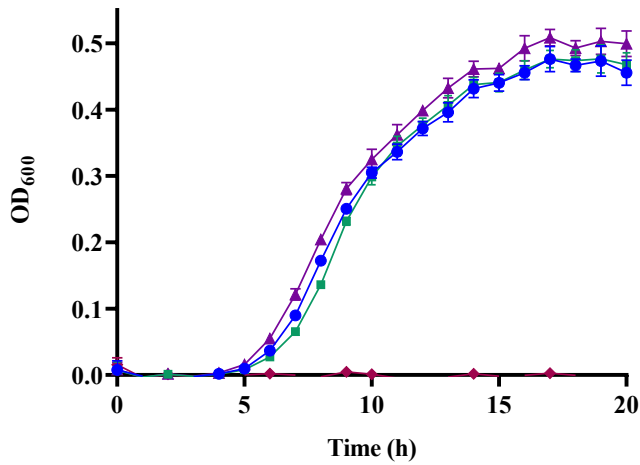

|               | CMY-2             | CTX-M-15         | KPC-3             | Control           |
|---------------|-------------------|------------------|-------------------|-------------------|
| $\bar{x}$ AUC | 4.95 <sup>a</sup> | 4.9 <sup>a</sup> | 5.37 <sup>a</sup> | 0.04 <sup>b</sup> |
| (SEM)         | (0.06)            | (0.06)           | (0.06)            | (0.01)            |

F) 128 µg/ml ampicillin

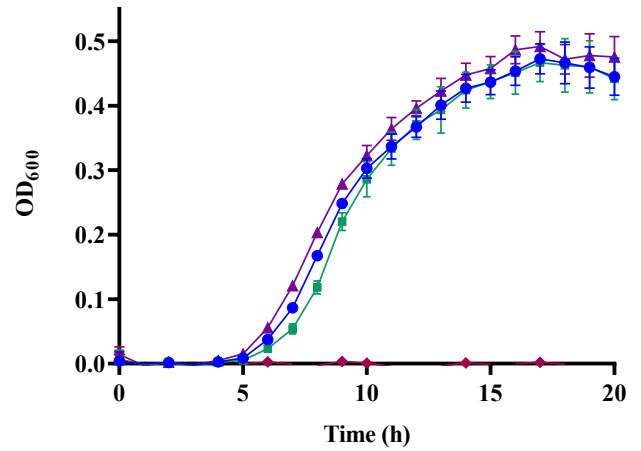

|               | CMY-2             | CTX-M-15          | KPC-3             | Control           |
|---------------|-------------------|-------------------|-------------------|-------------------|
| $\bar{x}$ AUC | 4.90 <sup>a</sup> | 4.73 <sup>a</sup> | 5.26 <sup>a</sup> | 0.04 <sup>b</sup> |
| (SEM)         | (0.09)            | (0.13)            | (0.09)            | (0.01)            |

G) 256 µg/ml ampicillin

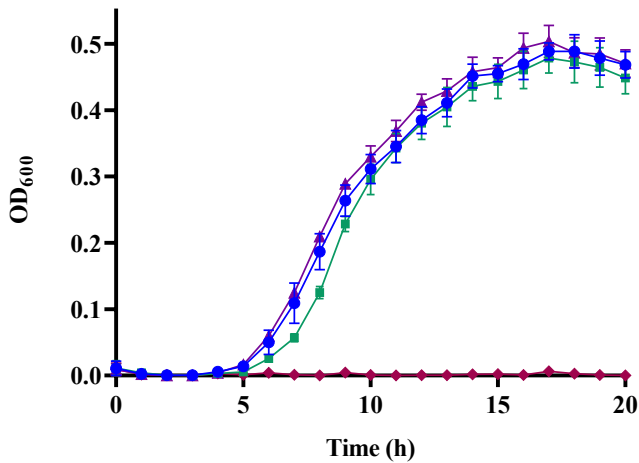

|               | CMY-2             | CTX-M-15          | KPC-3             | Control           |
|---------------|-------------------|-------------------|-------------------|-------------------|
| $\bar{x}$ AUC | 5.16 <sup>a</sup> | 4.86 <sup>a</sup> | 5.38 <sup>a</sup> | 0.04 <sup>b</sup> |
| (SEM)         | (0.1)             | (0.11)            | (0.08)            | (0.01)            |

H) 512 µg/ml ampicillin

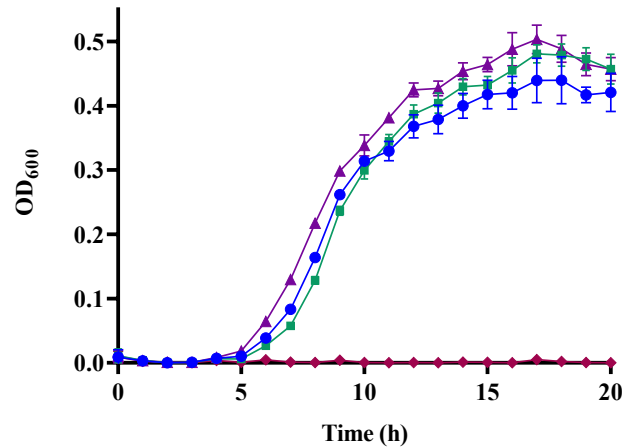

|               | CMY-2             | CTX-M-15          | KPC-3             | Control           |
|---------------|-------------------|-------------------|-------------------|-------------------|
| $\bar{x}$ AUC | 4.71 <sup>a</sup> | 4.88 <sup>a</sup> | 5.41 <sup>a</sup> | 0.03 <sup>b</sup> |
| (SEM)         | (0.09)            | (0.06)            | (0.07)            | (0.01)            |

● *bla*<sub>CMY-2</sub>   
 ■ *bla*<sub>CTX-M-15</sub>   
 ▲ *bla*<sub>KPC-3</sub>   
 ◆ pMMB207Δ*bla*<sub>Tem-1</sub> (control)

### I) 1,000 µg/ml ampicillin

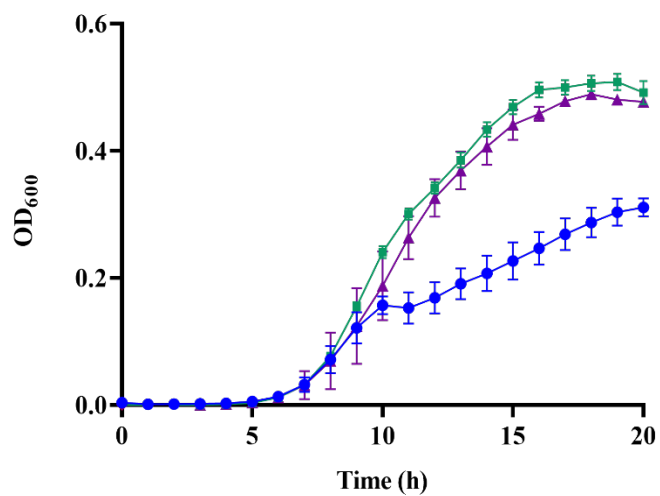

|               | CMY-2             | CTX-M-15          | KPC-3             | Control           |
|---------------|-------------------|-------------------|-------------------|-------------------|
| $\bar{x}$ AUC | 2.62 <sup>a</sup> | 4.71 <sup>b</sup> | 4.38 <sup>b</sup> | 0.01 <sup>c</sup> |
| (SEM)         | (0.10)            | (0.05)            | (0.14)            | (0.003)           |

### J) 1,500 µg/ml ampicillin

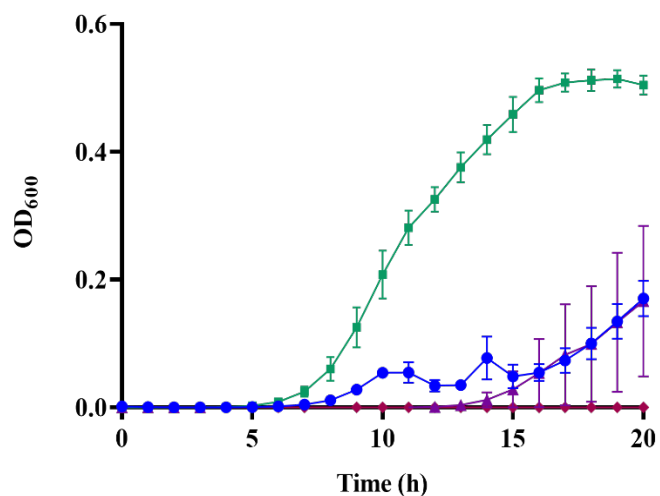

|               | CMY-2             | CTX-M-15          | KPC-3            | Control            |
|---------------|-------------------|-------------------|------------------|--------------------|
| $\bar{x}$ AUC | 0.80 <sup>a</sup> | 4.57 <sup>b</sup> | 0.5 <sup>c</sup> | 0.003 <sup>c</sup> |
| (SEM)         | (0.08)            | (0.1)             | (0.24)           | (0.001)            |

### K) 2,000 µg/ml ampicillin

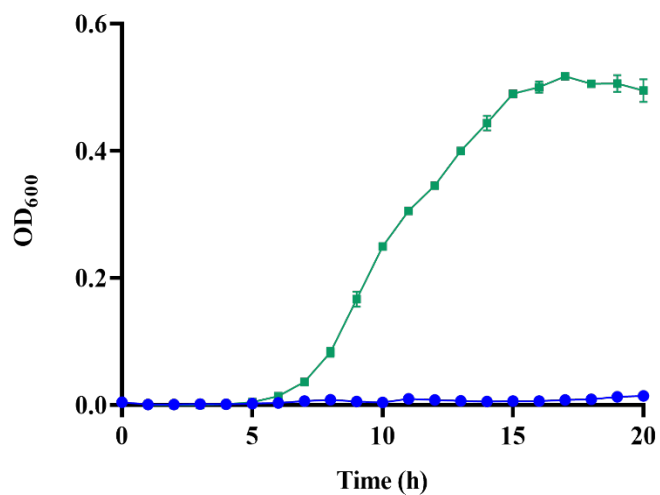

|               | CMY-2             | CTX-M-15          | KPC-3             | Control           |
|---------------|-------------------|-------------------|-------------------|-------------------|
| $\bar{x}$ AUC | 0.12 <sup>a</sup> | 4.82 <sup>b</sup> | 0.02 <sup>a</sup> | 0.01 <sup>a</sup> |
| (SEM)         | (0.02)            | (0.04)            | (0.002)           | (0.002)           |

### L) 2,500 µg/ml ampicillin

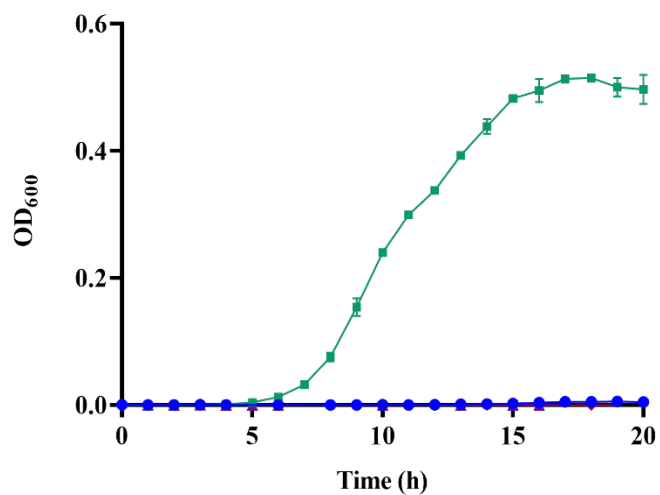

|               | CMY-2             | CTX-M-15          | KPC-3             | Control           |
|---------------|-------------------|-------------------|-------------------|-------------------|
| $\bar{x}$ AUC | 0.03 <sup>a</sup> | 4.74 <sup>b</sup> | 0.01 <sup>a</sup> | 0.01 <sup>a</sup> |
| (SEM)         | (0.01)            | (0.05)            | (0.002)           | (0.002)           |

● *bla*<sub>CMY-2</sub>   
 ■ *bla*<sub>CTX-M-15</sub>   
 ▲ *bla*<sub>KPC-3</sub>   
 ◆ pMMB207Δ*bla*<sub>Tem-1</sub> (control)

---

M) 3,000 µg/ml ampicillin

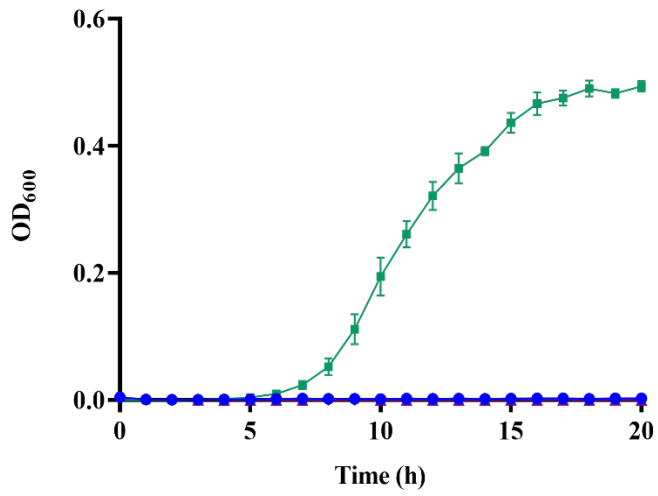

|               | CMY-2             | CTX-M-15          | KPC-3             | Control           |
|---------------|-------------------|-------------------|-------------------|-------------------|
| $\bar{x}$ AUC | 0.04 <sup>a</sup> | 4.33 <sup>b</sup> | 0.01 <sup>a</sup> | 0.01 <sup>a</sup> |
| (SEM)         | (0.004)           | (0.08)            | (0.003)           | (0.003)           |

---

● *bla*<sub>CMY-2</sub>    ■ *bla*<sub>CTX-M-15</sub>    ▲ *bla*<sub>KPC-3</sub>    ◆ pMMB207Δ*bla*<sub>Tem-1</sub> (control)

**Fig. S3. Growth of *E. coli* cultures when exposed to ceftiofur.** Average growth curves (3 independent replicates, +/- SEM) for the CTX-M-15- (green square), CMY-2- (blue circle), and KPC-3- (purple triangle) producing strains of *E. coli* and for the plasmid-only negative control strain (red diamond) in the presence of 0, 4, 8, 16, 32, 64, 128, or 256  $\mu\text{g/ml}$  of ceftiofur. The tables below each figure present average area under the curve (AUC) with the standard error of the mean (SEM). Subscripts represent statistically nonsignificant grouping according to one-way ANOVA and Tukey's multiple comparisons test, ( $P < 0.05$ ).

**A) No antibiotic**

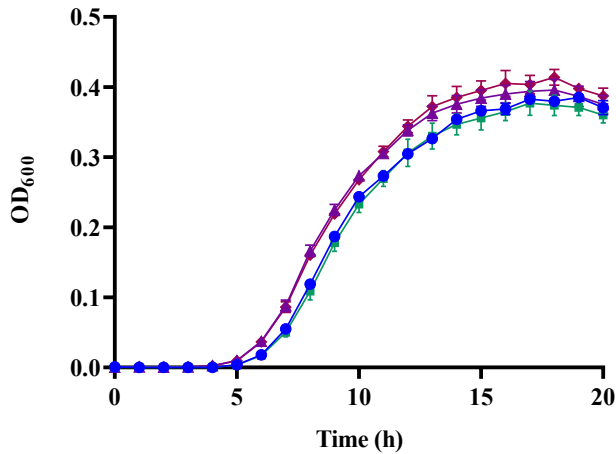

|               | CMY-2             | CTX-M-15          | KPC-3             | Control          |
|---------------|-------------------|-------------------|-------------------|------------------|
| $\bar{x}$ AUC | 3.95 <sup>a</sup> | 3.87 <sup>a</sup> | 4.32 <sup>a</sup> | 4.4 <sup>a</sup> |
| (SEM)         | (0.02)            | (0.06)            | (0.05)            | (0.05)           |

**B) 4  $\mu\text{g/ml}$  ceftiofur**

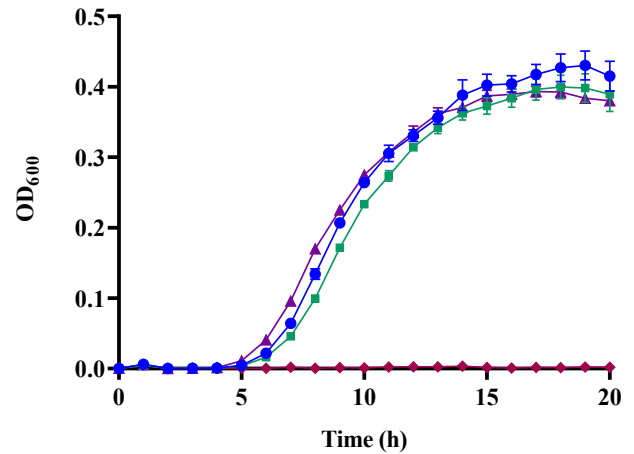

|               | CMY-2             | CTX-M-15          | KPC-3             | Control           |
|---------------|-------------------|-------------------|-------------------|-------------------|
| $\bar{x}$ AUC | 4.37 <sup>a</sup> | 4.01 <sup>a</sup> | 4.34 <sup>a</sup> | 0.03 <sup>b</sup> |
| (SEM)         | (0.06)            | (0.05)            | (0.0)             | (0.01)            |

**C) 8  $\mu\text{g/ml}$  ceftiofur**

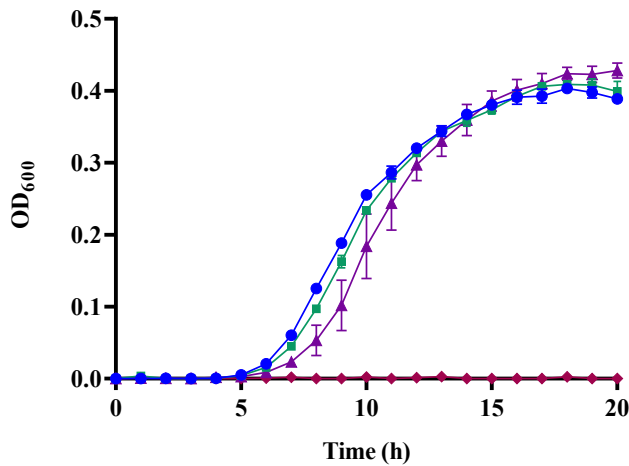

|               | CMY-2             | CTX-M-15          | KPC-3             | Control           |
|---------------|-------------------|-------------------|-------------------|-------------------|
| $\bar{x}$ AUC | 4.13 <sup>a</sup> | 4.01 <sup>a</sup> | 3.87 <sup>a</sup> | 0.01 <sup>b</sup> |
| (SEM)         | (0.03)            | (0.03)            | (0.11)            | (0.01)            |

**D) 16  $\mu\text{g/ml}$  ceftiofur**

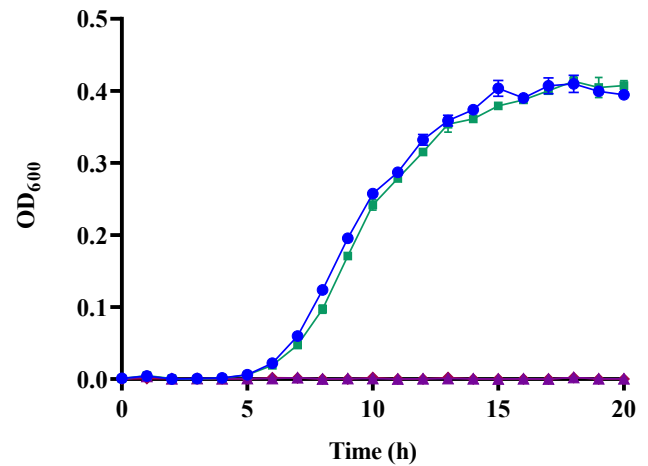

|               | CMY-2             | CTX-M-15          | KPC-3             | Control           |
|---------------|-------------------|-------------------|-------------------|-------------------|
| $\bar{x}$ AUC | 4.23 <sup>a</sup> | 4.09 <sup>a</sup> | 0.02 <sup>b</sup> | 0.01 <sup>b</sup> |
| (SEM)         | (0.03)            | (0.03)            | (0.01)            | (0.01)            |

● *bla*<sub>CMY-2</sub>   
 ■ *bla*<sub>CTX-M-15</sub>   
 ▲ *bla*<sub>KPC-3</sub>   
 ◆ pMMB207 $\Delta$ *bla*<sub>Tem-1</sub> (control)

### E) 32 µg/ml ceftiofur

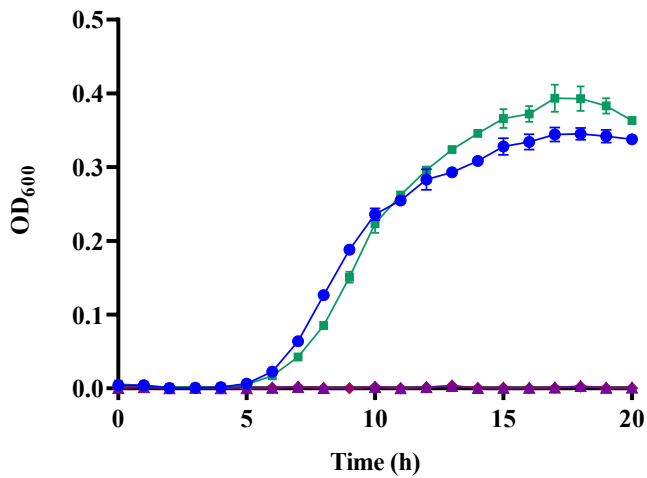

|               | CMY-2             | CTX-M-15          | KPC-3             | Control           |
|---------------|-------------------|-------------------|-------------------|-------------------|
| $\bar{x}$ AUC | 3.65 <sup>a</sup> | 3.85 <sup>a</sup> | 0.02 <sup>b</sup> | 0.02 <sup>b</sup> |
| (SEM)         | (0.04)            | (0.05)            | (0.01)            | (0.01)            |

### F) 64 µg/ml ceftiofur

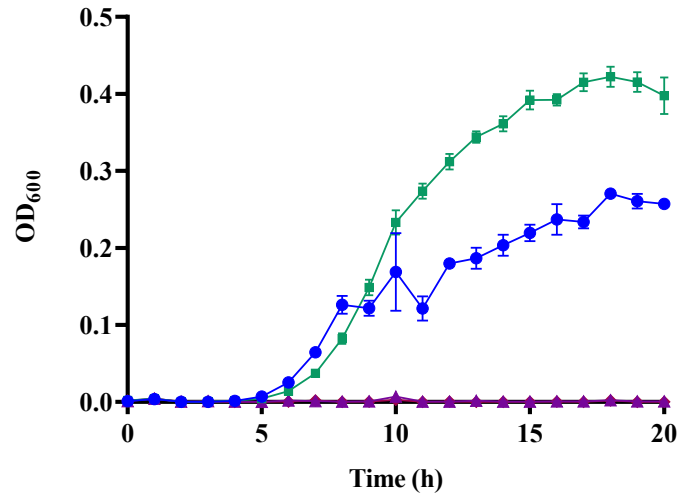

|               | CMY-2             | CTX-M-15          | KPC-3             | Control           |
|---------------|-------------------|-------------------|-------------------|-------------------|
| $\bar{x}$ AUC | 2.56 <sup>a</sup> | 4.05 <sup>b</sup> | 0.03 <sup>c</sup> | 0.02 <sup>c</sup> |
| (SEM)         | (0.08)            | (0.05)            | (0.01)            | (0.01)            |

### G) 128 µg/ml ceftiofur

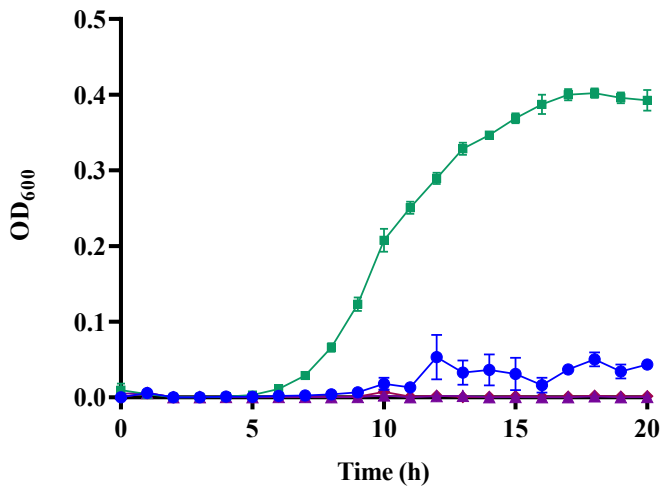

|               | CMY-2             | CTX-M-15          | KPC-3             | Control           |
|---------------|-------------------|-------------------|-------------------|-------------------|
| $\bar{x}$ AUC | 0.37 <sup>a</sup> | 3.82 <sup>b</sup> | 0.02 <sup>c</sup> | 0.03 <sup>c</sup> |
| (SEM)         | (0.06)            | (0.04)            | (0.01)            | (0.01)            |

### H) 256 µg/ml ceftiofur

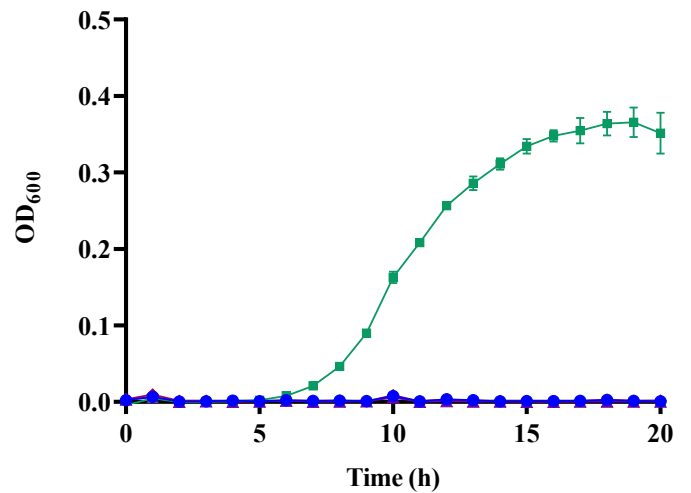

|               | CMY-2             | CTX-M-15          | KPC-3             | Control           |
|---------------|-------------------|-------------------|-------------------|-------------------|
| $\bar{x}$ AUC | 0.04 <sup>a</sup> | 3.34 <sup>b</sup> | 0.02 <sup>a</sup> | 0.04 <sup>a</sup> |
| (SEM)         | (0.01)            | (0.05)            | (0.01)            | (0.01)            |

● *bla*<sub>CMY-2</sub>   
 ■ *bla*<sub>CTX-M-15</sub>   
 ▲ *bla*<sub>KPC-3</sub>   
 ◆ pMMB207Δ*bla*<sub>Tem-1</sub> (control)

**Fig. S4. Growth of *E. coli* cultures when exposed to desfuroylceftiofur (DFC).** Average growth curves (3 independent replicates, +/- SEM) for the CTX-M-15- (green square), CMY-2- (blue circle), and KPC-3- (purple triangle) producing strains of *E. coli* and for the plasmid-only negative control strain (red diamond) in the presence of 0, 4, 8, 16, 32, 64, 128, or 256  $\mu\text{g/ml}$  of **DFC**. The tables below each figure present average area under the curve (AUC) with the standard error of the mean (SEM). Subscripts represent statistically nonsignificant grouping according to one-way ANOVA and Tukey's multiple comparisons test, ( $P < 0.05$ ).

**A) No antibiotic**

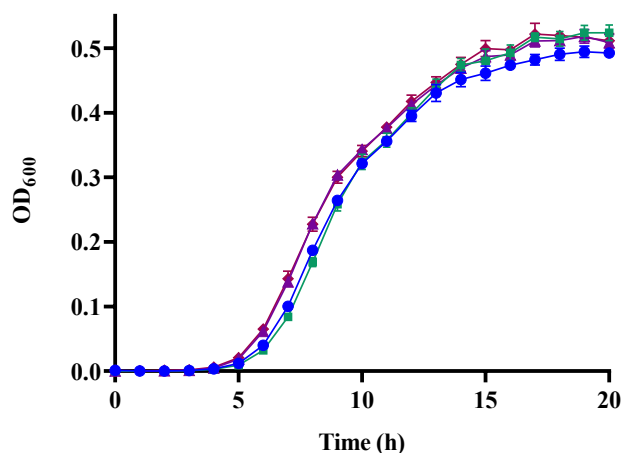

|                     | CMY-2                       | CTX-M-15                    | KPC-3                       | Control                     |
|---------------------|-----------------------------|-----------------------------|-----------------------------|-----------------------------|
| $\bar{x}$ AUC (SEM) | 5.21 <sup>a</sup><br>(0.04) | 5.34 <sup>a</sup><br>(0.05) | 5.57 <sup>a</sup><br>(0.03) | 5.63 <sup>a</sup><br>(0.05) |

**B) 4  $\mu\text{g/ml}$  DFC**

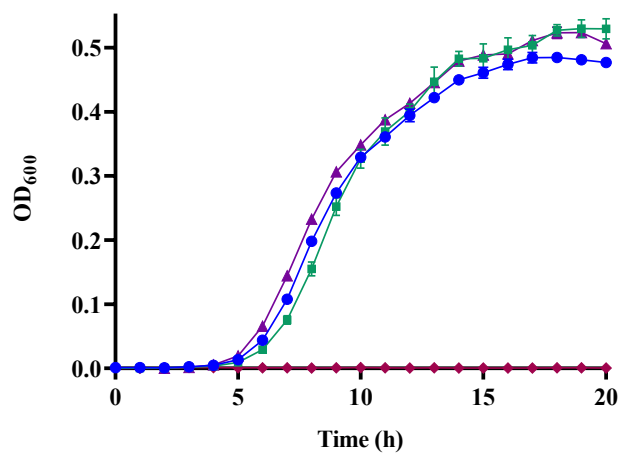

|                     | CMY-2                       | CTX-M-15                    | KPC-3                       | Control                      |
|---------------------|-----------------------------|-----------------------------|-----------------------------|------------------------------|
| $\bar{x}$ AUC (SEM) | 5.23 <sup>a</sup><br>(0.03) | 5.36 <sup>a</sup><br>(0.07) | 5.64 <sup>a</sup><br>(0.03) | 0.01 <sup>b</sup><br>(0.002) |

**C) 8  $\mu\text{g/ml}$  DFC**

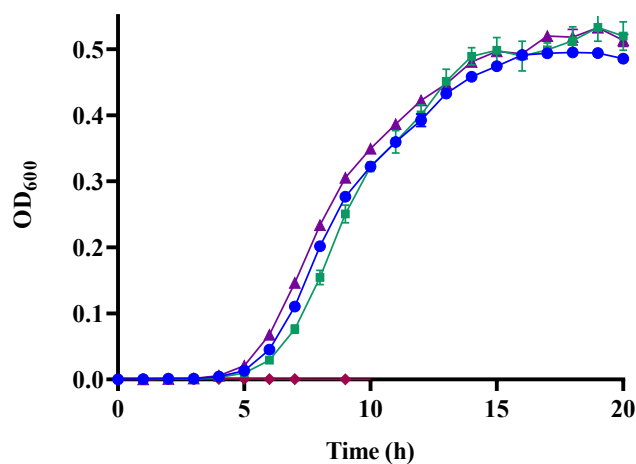

|                     | CMY-2                       | CTX-M-15                    | KPC-3                       | Control                      |
|---------------------|-----------------------------|-----------------------------|-----------------------------|------------------------------|
| $\bar{x}$ AUC (SEM) | 5.31 <sup>a</sup><br>(0.03) | 5.34 <sup>a</sup><br>(0.07) | 5.67 <sup>a</sup><br>(0.03) | 0.01 <sup>b</sup><br>(0.002) |

**D) 16  $\mu\text{g/ml}$  DFC**

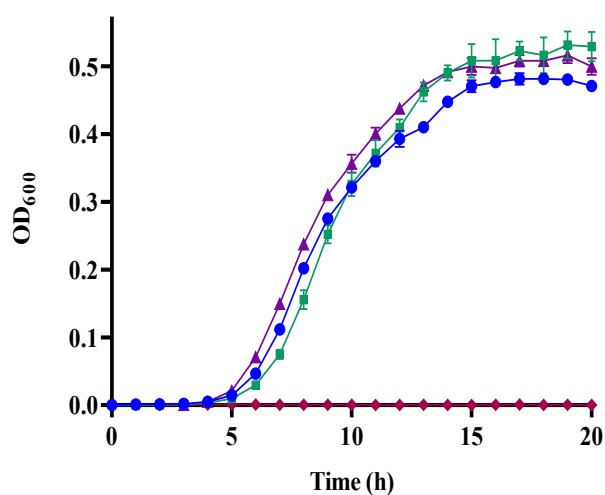

|                     | CMY-2                       | CTX-M-15                    | KPC-3                       | Control                      |
|---------------------|-----------------------------|-----------------------------|-----------------------------|------------------------------|
| $\bar{x}$ AUC (SEM) | 5.22 <sup>a</sup><br>(0.03) | 5.44 <sup>a</sup><br>(0.08) | 5.73 <sup>a</sup><br>(0.04) | 0.01 <sup>b</sup><br>(0.001) |

● *bla*<sub>CMY-2</sub>   
 ■ *bla*<sub>CTX-M-15</sub>   
 ▲ *bla*<sub>KPC-3</sub>   
 ◆ pMMB207 $\Delta$ *bla*<sub>Tcm-1</sub> (control)

E) 32 µg/ml DFC

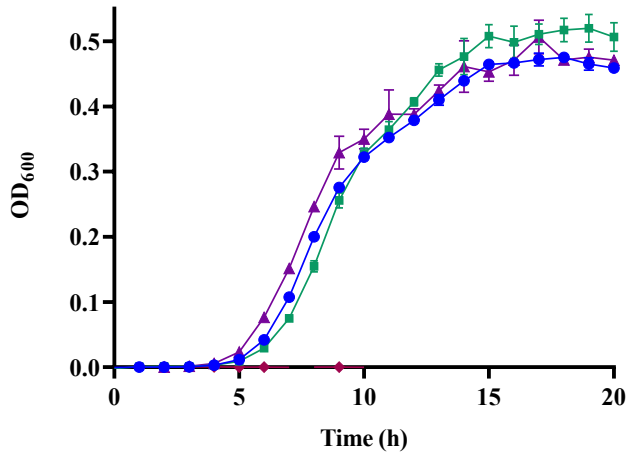

|               | CMY-2             | CTX-M-15          | KPC-3             | Control           |
|---------------|-------------------|-------------------|-------------------|-------------------|
| $\bar{x}$ AUC | 5.12 <sup>a</sup> | 5.37 <sup>a</sup> | 5.46 <sup>a</sup> | 0.01 <sup>b</sup> |
| (SEM)         | (0.03)            | (0.07)            | (0.09)            | (0.002)           |

F) 64 µg/ml DFC

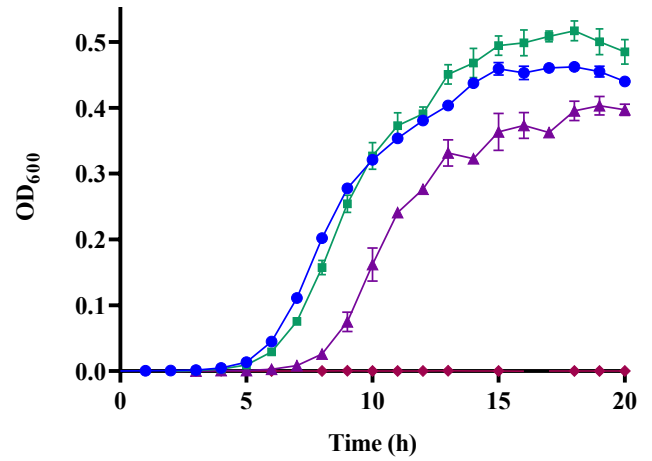

|               | CMY-2             | CTX-M-15          | KPC-3             | Control           |
|---------------|-------------------|-------------------|-------------------|-------------------|
| $\bar{x}$ AUC | 5.06 <sup>a</sup> | 5.30 <sup>a</sup> | 3.55 <sup>b</sup> | 0.01 <sup>c</sup> |
| (SEM)         | (0.03)            | (0.07)            | (0.07)            | (0.002)           |

G) 128 µg/ml DFC

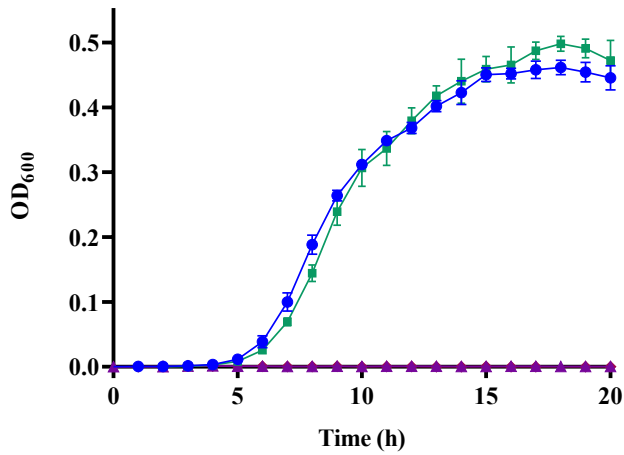

|               | CMY-2             | CTX-M-15          | KPC-3             | Control           |
|---------------|-------------------|-------------------|-------------------|-------------------|
| $\bar{x}$ AUC | 4.96 <sup>a</sup> | 5.01 <sup>a</sup> | 0.01 <sup>b</sup> | 0.01 <sup>b</sup> |
| (SEM)         | (0.03)            | (0.06)            | (0.001)           | (0.001)           |

H) 256 µg/ml DFC

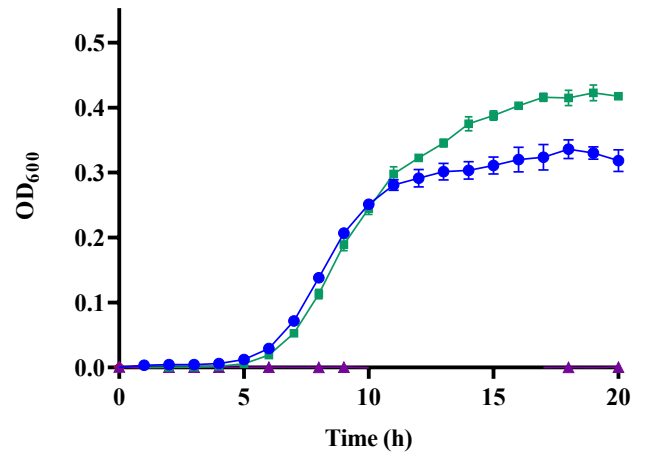

|               | CMY-2             | CTX-M-15          | KPC-3             | Control           |
|---------------|-------------------|-------------------|-------------------|-------------------|
| $\bar{x}$ AUC | 3.69 <sup>a</sup> | 4.22 <sup>b</sup> | 0.01 <sup>c</sup> | 0.03 <sup>c</sup> |
| (SEM)         | (0.06)            | (0.04)            | (0.004)           | (0.01)            |

● *bla*<sub>CMY-2</sub>   
 ■ *bla*<sub>CTX-M-15</sub>   
 ▲ *bla*<sub>KPC-3</sub>   
 ◆ pMMB207Δ*bla*<sub>Tem-1</sub> (control)

**Figure S5. Growth of *E. coli* cultures when exposed to DFC-cysteine.** Average growth curves (3 independent replicates, +/- SEM) for the CTX-M-15- (green square), CMY-2- (blue circle), and KPC-3- (purple triangle) producing strains of *E. coli* and for the plasmid-only negative control strain (red diamond) in the presence of 0, 4, 8, 16, 32, 64, 128, or 256  $\mu\text{g/ml}$  of **DFC-cysteine**. The tables below each figure present average area under the curve (AUC) with the standard error of the mean (SEM). Subscripts represent statistically nonsignificant grouping according to one-way ANOVA and Tukey's multiple comparisons test, ( $P < 0.05$ ).

**A) No antibiotic**

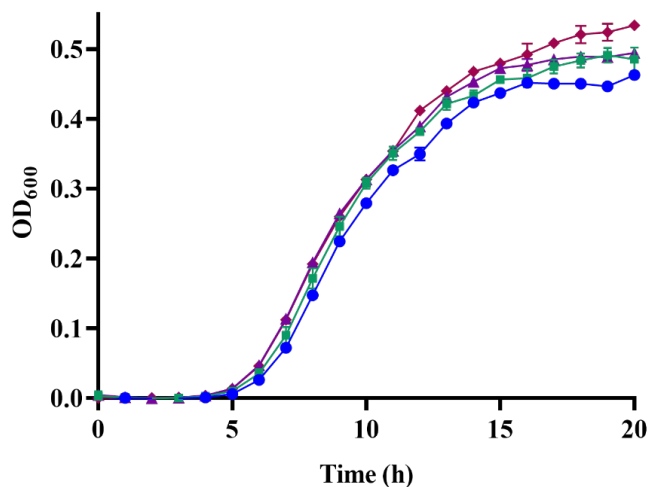

|               | CMY-2             | CTX-M-15          | KPC-3             | Control           |
|---------------|-------------------|-------------------|-------------------|-------------------|
| $\bar{x}$ AUC | 4.72 <sup>a</sup> | 5.06 <sup>b</sup> | 5.24 <sup>b</sup> | 5.41 <sup>b</sup> |
| (SEM)         | (0.03)            | (0.05)            | (0.02)            | (0.04)            |

**B) 4  $\mu\text{g/ml}$  DFC-cysteine**

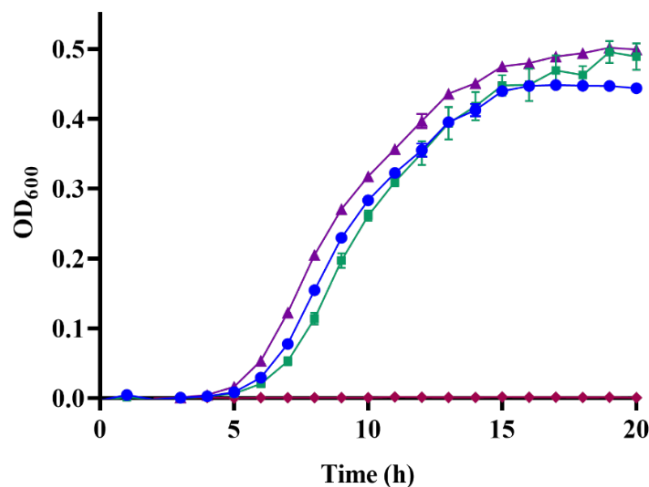

|               | CMY-2             | CTX-M-15          | KPC-3             | Control           |
|---------------|-------------------|-------------------|-------------------|-------------------|
| $\bar{x}$ AUC | 4.73 <sup>a</sup> | 4.70 <sup>a</sup> | 5.33 <sup>b</sup> | 0.02 <sup>c</sup> |
| (SEM)         | (0.02)            | (0.07)            | (0.03)            | (0.003)           |

**C) 8  $\mu\text{g/ml}$  DFC-cysteine**

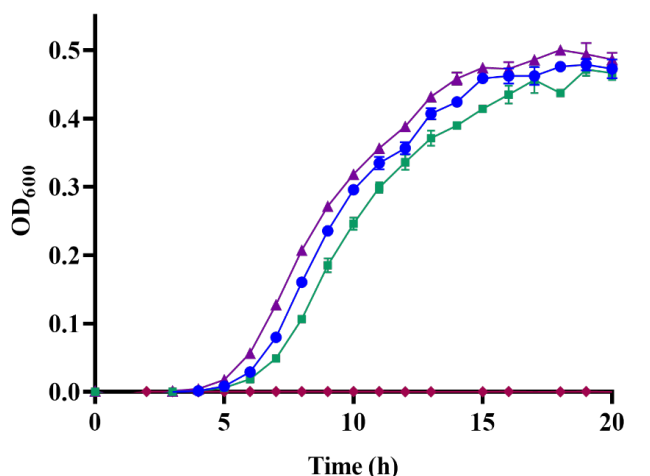

|               | CMY-2             | CTX-M-15          | KPC-3             | Control           |
|---------------|-------------------|-------------------|-------------------|-------------------|
| $\bar{x}$ AUC | 4.92 <sup>a</sup> | 4.47 <sup>b</sup> | 5.33 <sup>c</sup> | 0.01 <sup>d</sup> |
| (SEM)         | (0.04)            | (0.1)             | (0.04)            | (0.01)            |

**D) 16  $\mu\text{g/ml}$  DFC-cysteine**

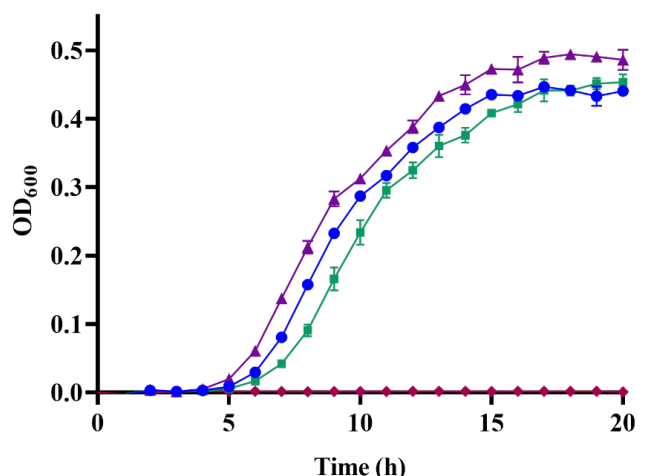

|               | CMY-2            | CTX-M-15          | KPC-3             | Control           |
|---------------|------------------|-------------------|-------------------|-------------------|
| $\bar{x}$ AUC | 4.7 <sup>a</sup> | 4.31 <sup>b</sup> | 5.33 <sup>c</sup> | 0.03 <sup>d</sup> |
| (SEM)         | (0.03)           | (0.05)            | (0.04)            | (0.01)            |

● *bla*<sub>CMY-2</sub>   
 ■ *bla*<sub>CTX-M-15</sub>   
 ▲ *bla*<sub>KPC-3</sub>   
 ◆ pMMB207 $\Delta$ *bla*<sub>Tem-1</sub> (control)



### E 32 µg/ml DFC-cysteine

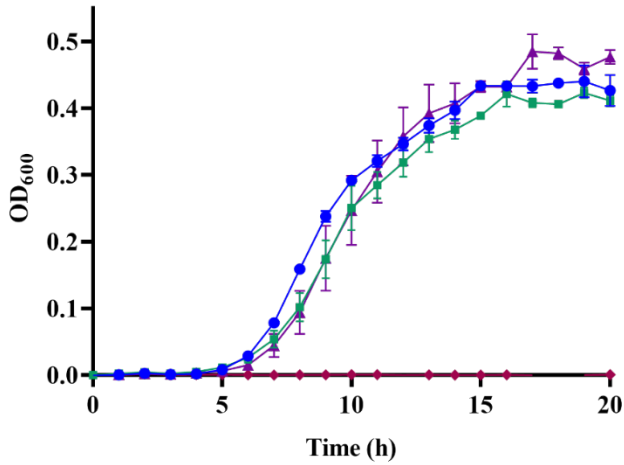

|               | CMY-2             | CTX-M-15          | KPC-3             | Control           |
|---------------|-------------------|-------------------|-------------------|-------------------|
| $\bar{x}$ AUC | 4.64 <sup>a</sup> | 4.21 <sup>a</sup> | 4.58 <sup>a</sup> | 0.01 <sup>b</sup> |
| (SEM)         | (0.1)             | (0.1)             | (0.15)            | (0.003)           |

### F) 64 µg/ml DFC-cysteine

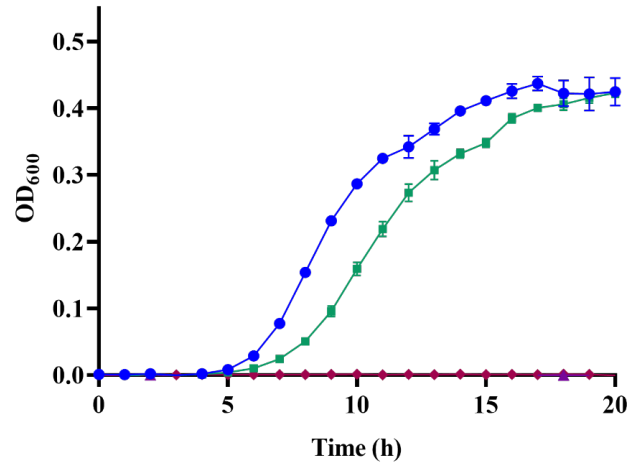

|               | CMY-2             | CTX-M-15          | KPC-3             | Control           |
|---------------|-------------------|-------------------|-------------------|-------------------|
| $\bar{x}$ AUC | 4.55 <sup>a</sup> | 3.65 <sup>b</sup> | 0.01 <sup>c</sup> | 0.02 <sup>c</sup> |
| (SEM)         | (0.1)             | (0.04)            | (0.003)           | (0.01)            |

### G) 128 µg/ml DFC-cysteine

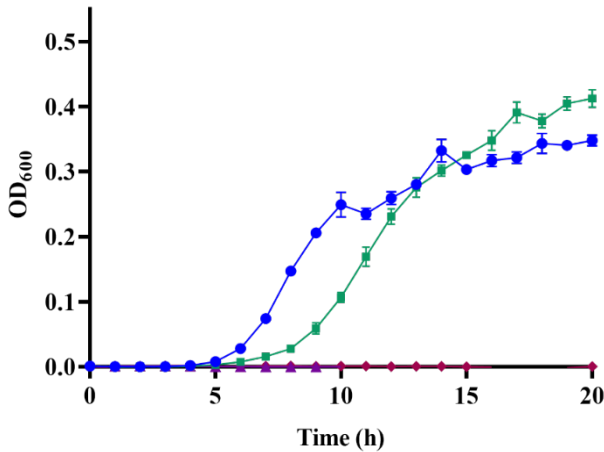

|               | CMY-2             | CTX-M-15          | KPC-3             | Control           |
|---------------|-------------------|-------------------|-------------------|-------------------|
| $\bar{x}$ AUC | 3.62 <sup>a</sup> | 3.26 <sup>b</sup> | 0.02 <sup>c</sup> | 0.02 <sup>c</sup> |
| (SEM)         | (0.1)             | (0.1)             | (0.004)           | (0.01)            |

### H) 256 µg/ml DFC-cysteine

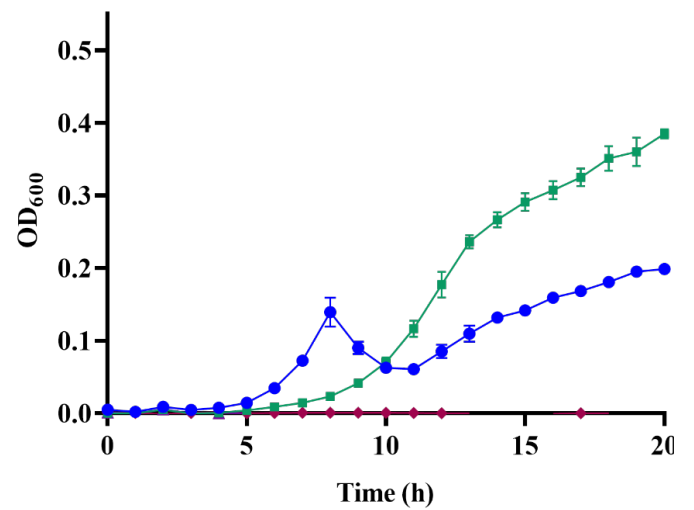

|               | CMY-2             | CTX-M-15          | KPC-3             | Control           |
|---------------|-------------------|-------------------|-------------------|-------------------|
| $\bar{x}$ AUC | 1.77 <sup>a</sup> | 2.79 <sup>b</sup> | 0.03 <sup>c</sup> | 0.01 <sup>c</sup> |
| (SEM)         | (0.04)            | (0.1)             | (0.01)            | (0.01)            |

● *bla*<sub>CMY-2</sub>   
 ■ *bla*<sub>CTX-M-15</sub>   
 ▲ *bla*<sub>KPC-3</sub>   
 ◆ pMMB207Δ*bla*<sub>Tem-1</sub> (control)

**Figure S6. Growth of *E. coli* cultures when exposed to DFC-dimer.** Average growth curves (3 independent replicates, +/- SEM) for the CTX-M-15- (green square), CMY-2- (blue circle), and KPC-3- (purple triangle) producing strains of *E. coli* and for the plasmid-only negative control strain (red diamond) in the presence of 0, 4, 8, 16, 32, 64, 128, or 256  $\mu\text{g/ml}$  of **DFC-dimer**. The tables below each figure present average area under the curve (AUC) with the standard error of the mean (SEM). Subscripts represent statistically nonsignificant grouping according to one-way ANOVA and Tukey's multiple comparisons test, ( $P < 0.05$ ).

**A) No antibiotic**

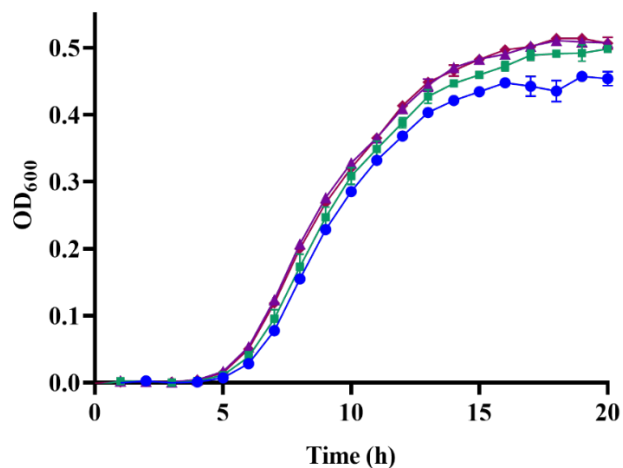

|               | CMY-2             | CTX-M-15          | KPC-3             | Control           |
|---------------|-------------------|-------------------|-------------------|-------------------|
| $\bar{x}$ AUC | 4.76 <sup>a</sup> | 5.15 <sup>b</sup> | 5.46 <sup>b</sup> | 5.44 <sup>b</sup> |
| (SEM)         | (0.04)            | (0.10)            | (0.02)            | (0.02)            |

**B) 4  $\mu\text{g/ml}$  DFC-dimer**

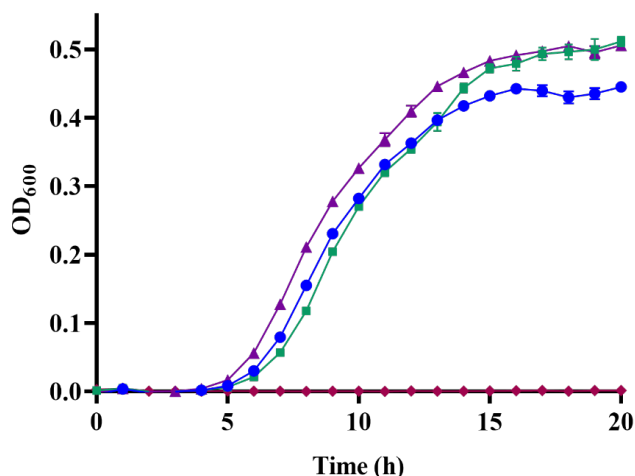

|               | CMY-2             | CTX-M-15         | KPC-3             | Control           |
|---------------|-------------------|------------------|-------------------|-------------------|
| $\bar{x}$ AUC | 4.70 <sup>a</sup> | 4.9 <sup>b</sup> | 5.44 <sup>c</sup> | 0.02 <sup>d</sup> |
| (SEM)         | (0.03)            | (0.04)           | (0.03)            | (0.01)            |

**C) 8  $\mu\text{g/ml}$  DFC-dimer**

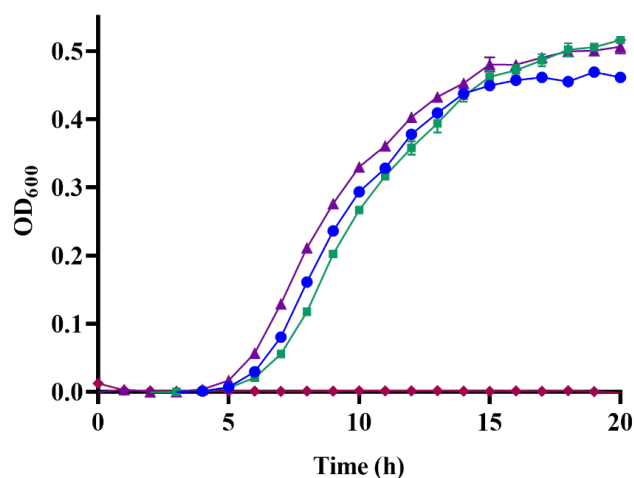

|               | CMY-2             | CTX-M-15          | KPC-3             | Control           |
|---------------|-------------------|-------------------|-------------------|-------------------|
| $\bar{x}$ AUC | 4.89 <sup>a</sup> | 4.87 <sup>a</sup> | 5.38 <sup>b</sup> | 0.03 <sup>c</sup> |
| (SEM)         | (0.02)            | (0.03)            | (0.03)            | (0.01)            |

**D) 16  $\mu\text{g/ml}$  DFC-dimer**

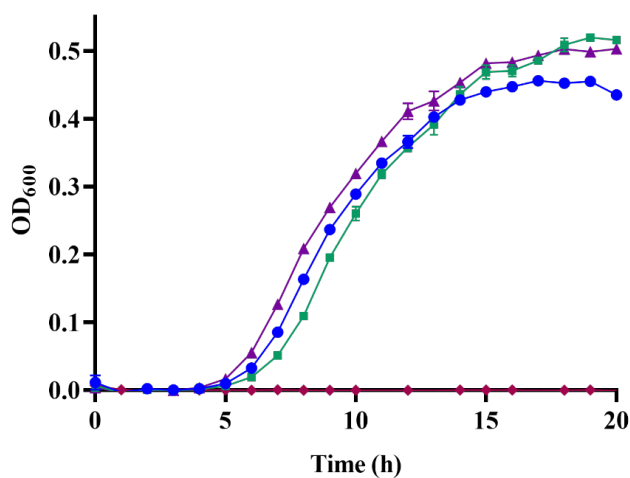

|               | CMY-2             | CTX-M-15          | KPC-3             | Control           |
|---------------|-------------------|-------------------|-------------------|-------------------|
| $\bar{x}$ AUC | 4.83 <sup>a</sup> | 4.87 <sup>a</sup> | 5.37 <sup>b</sup> | 0.01 <sup>c</sup> |
| (SEM)         | (0.03)            | (0.04)            | (0.03)            | (0.01)            |

● *bla*<sub>CMY-2</sub>   
 ■ *bla*<sub>CTX-M-15</sub>   
 ▲ *bla*<sub>KPC-3</sub>   
 ◆ pMMB207 $\Delta$ *bla*<sub>Tem-1</sub> (control)

E) 32 µg/ml DFC-dimer

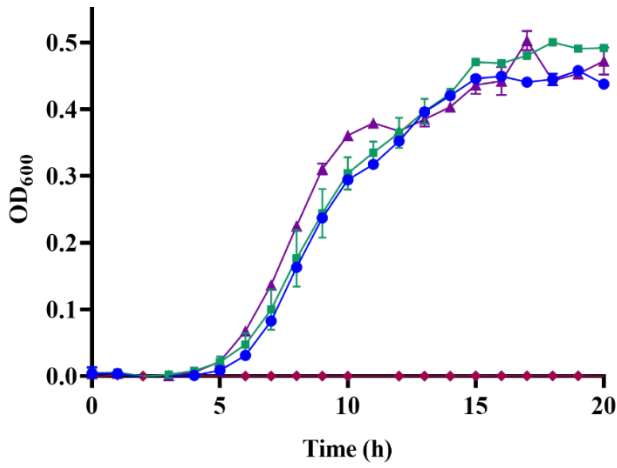

|               | CMY-2             | CTX-M-15         | KPC-3             | Control           |
|---------------|-------------------|------------------|-------------------|-------------------|
| $\bar{x}$ AUC | 4.77 <sup>a</sup> | 5.1 <sup>a</sup> | 5.18 <sup>a</sup> | 0.01 <sup>b</sup> |
| (SEM)         | (0.02)            | (0.1)            | (0.05)            | (0.003)           |

F) 64 µg/ml DFC-dimer

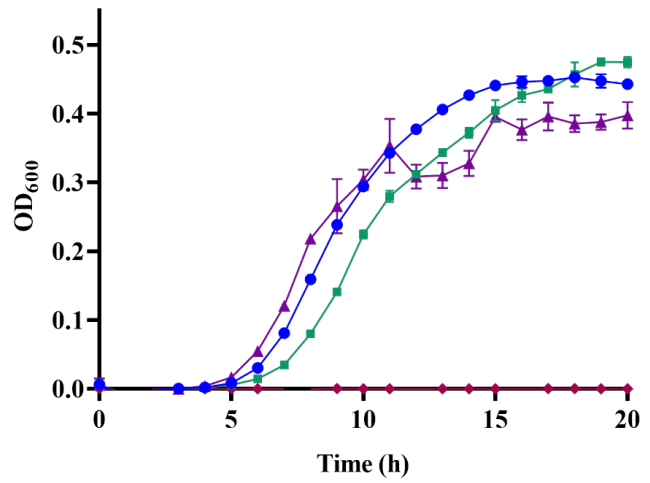

|               | CMY-2             | CTX-M-15          | KPC-3             | Control           |
|---------------|-------------------|-------------------|-------------------|-------------------|
| $\bar{x}$ AUC | 4.84 <sup>a</sup> | 4.26 <sup>b</sup> | 4.43 <sup>c</sup> | 0.01 <sup>d</sup> |
| (SEM)         | (0.03)            | (0.04)            | (0.1)             | (0.01)            |

G) 128 µg/ml DFC-dimer

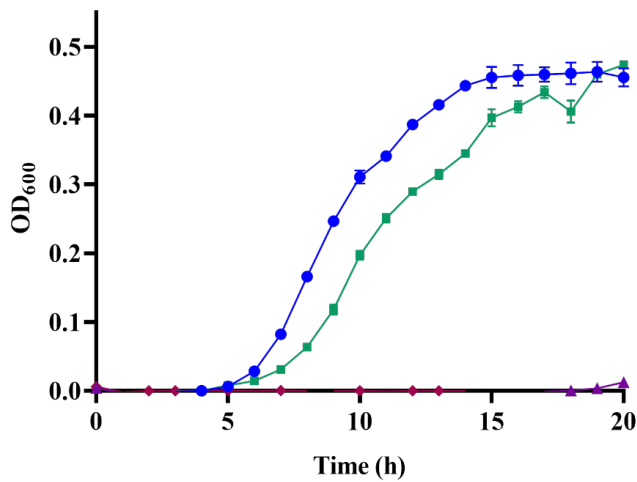

|               | CMY-2             | CTX-M-15          | KPC-3             | Control           |
|---------------|-------------------|-------------------|-------------------|-------------------|
| $\bar{x}$ AUC | 4.97 <sup>a</sup> | 3.99 <sup>b</sup> | 0.03 <sup>c</sup> | 0.02 <sup>c</sup> |
| (SEM)         | (0.1)             | (0.03)            | (0.01)            | (0.01)            |

H) 256 µg/ml DFC-dimer

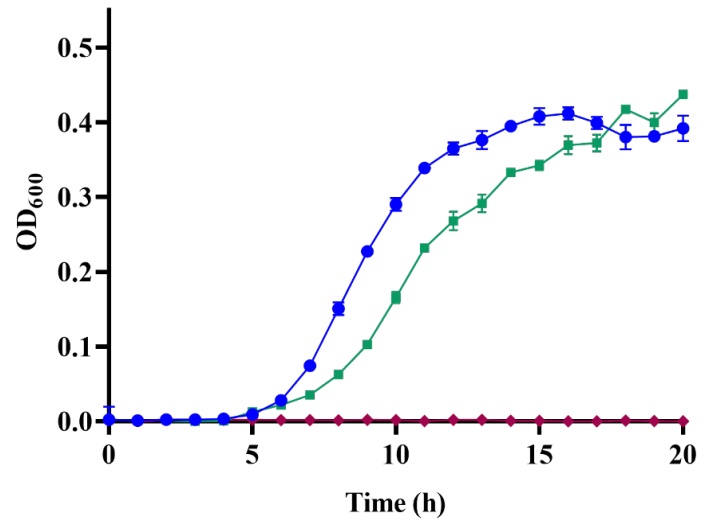

|               | CMY-2             | CTX-M-15          | KPC-3             | Control           |
|---------------|-------------------|-------------------|-------------------|-------------------|
| $\bar{x}$ AUC | 4.44 <sup>a</sup> | 3.66 <sup>b</sup> | 0.03 <sup>c</sup> | 0.03 <sup>c</sup> |
| (SEM)         | (0.1)             | (0.04)            | (0.01)            | (0.02)            |

● *bla*<sub>CMY-2</sub>   
 ■ *bla*<sub>CTX-M-15</sub>   
 ▲ *bla*<sub>KPC-3</sub>   
 ◆ pMMB207Δ*bla*<sub>Tem-1</sub> (control)

**Fig. S7. SDS-PAGE analysis for CTX-M-15, KPC-3, and CMY-2 after HPLC purification.** Coomassie stained SDS-PAGE gel showing a mass standard (M), CTX-M-15 (31 kDa), KPC-3 (32 kDa) and CMY-2 (37 kDa) protein bands. These preparations were used to estimate catalytic efficiency for each enzyme.

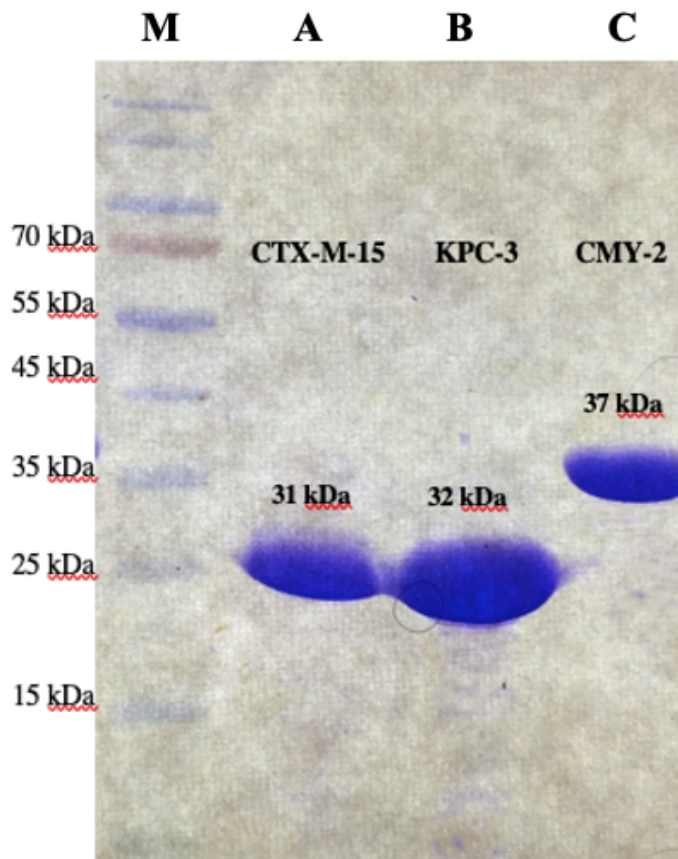

**Fig. S8. Kinetic assays of CTX-M-15, CMY-2, and KPC-3 against (A) ampicillin, (B) ceftiofur (C) desfuroylceftiofur (DFC), (C) DFC-cysteine, (D) DFC-dimer and (E) DFC-dimer.** Velocity plots are used in the calculation of steady-state kinetic parameters (Table 1). GraphPad Prism (San Diego, CA) was used to draw the plots. Data points represent the average of three independent replicates +/- SEM. See Table 1, Fig. S7 and the methods section for additional information.

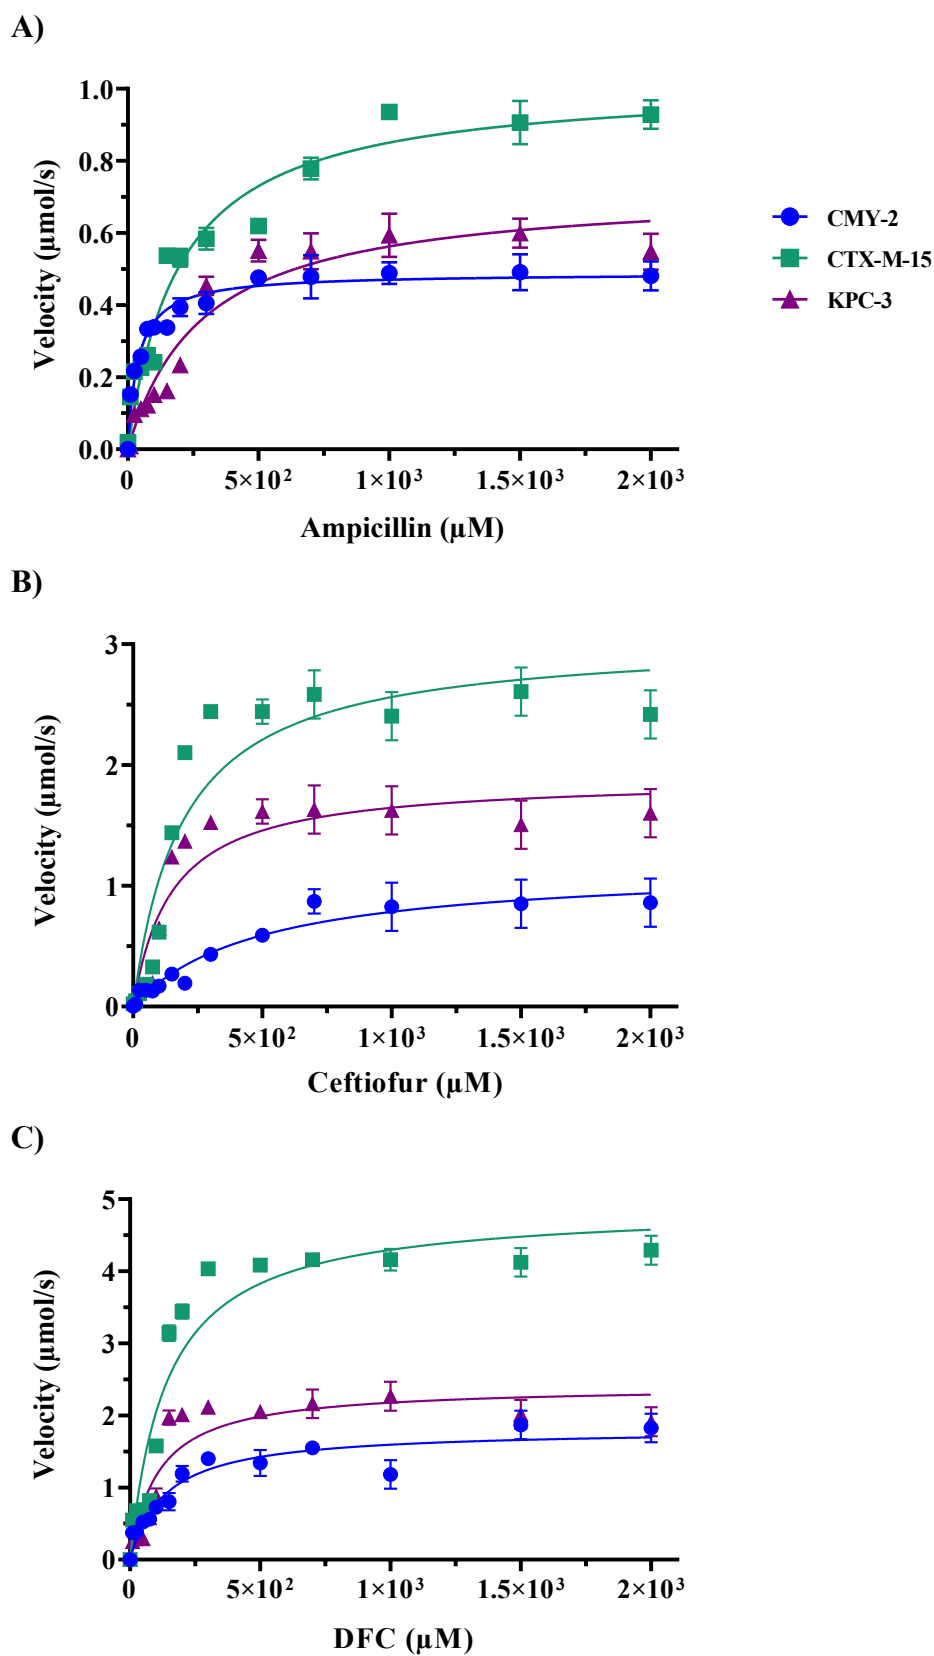

D)

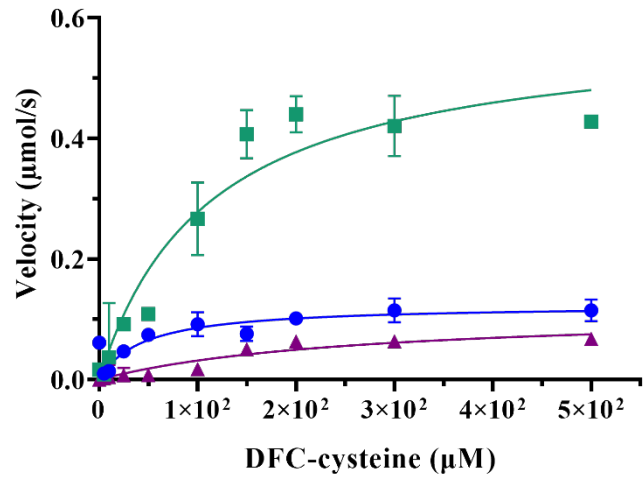

E)

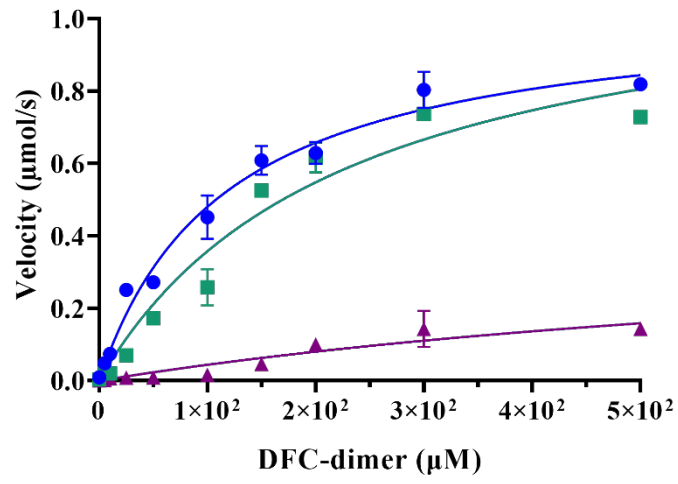

**Fig. S9. *E. coli* cultures with ceftiofur added at 5 or 8 hours post inoculation.** Average growth curves (3 independent replicates, +/- SEM) for the CTX-M-15- (green square), CMY-2- (blue circle), and KPC-3- (purple triangle) producing strains of *E. coli* and for the plasmid-only negative control strain (red diamond) with no antibiotic for the first five hours (left column) or for the first 8 hours (right column) before adding 4, 8, 16, 32, 64, 128, or 256  $\mu\text{g/ml}$  ceftiofur. The tables below each figure present average area under the curve (AUC) with the standard error of the mean (SEM). Subscripts represent statistically nonsignificant grouping according to one-way ANOVA and Tukey's multiple comparisons test, ( $P < 0.05$ ).

**A) No ceftiofur added at 5 hours**

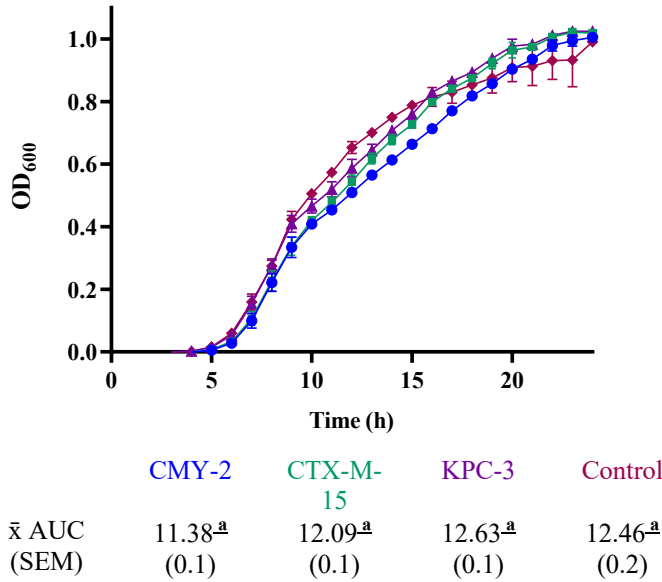

**B) No ceftiofur added at 8 hours**

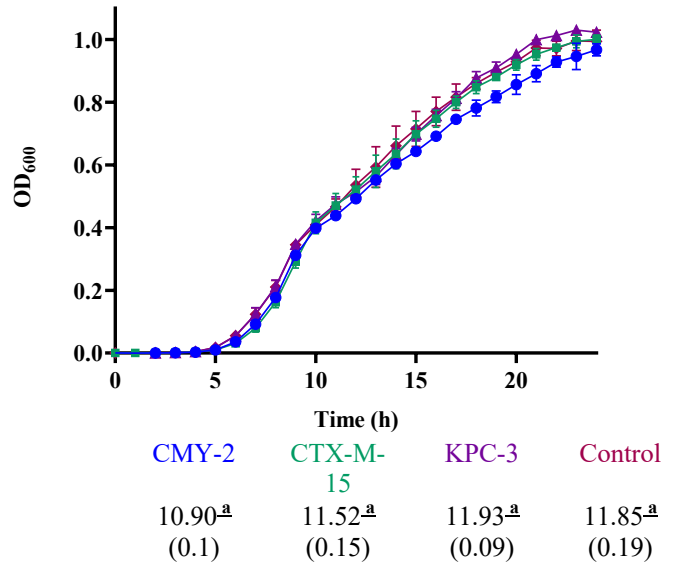

**C) 4  $\mu\text{g/ml}$  ceftiofur added at 5 hours**

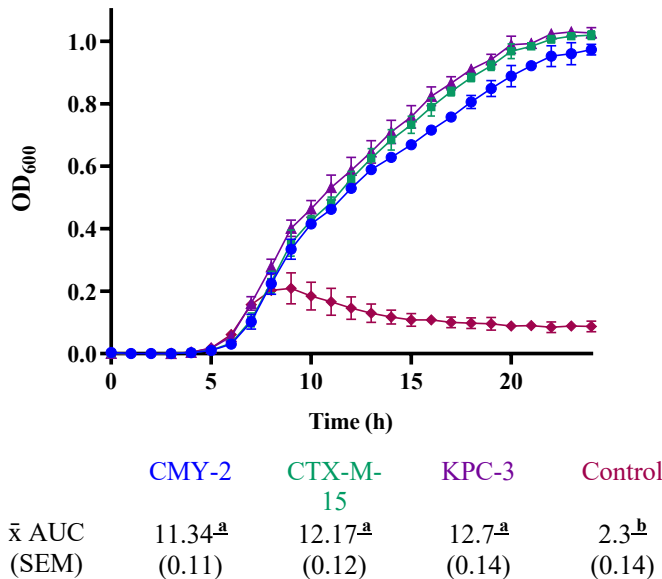

**D) 4  $\mu\text{g/ml}$  ceftiofur added at 8 hours**

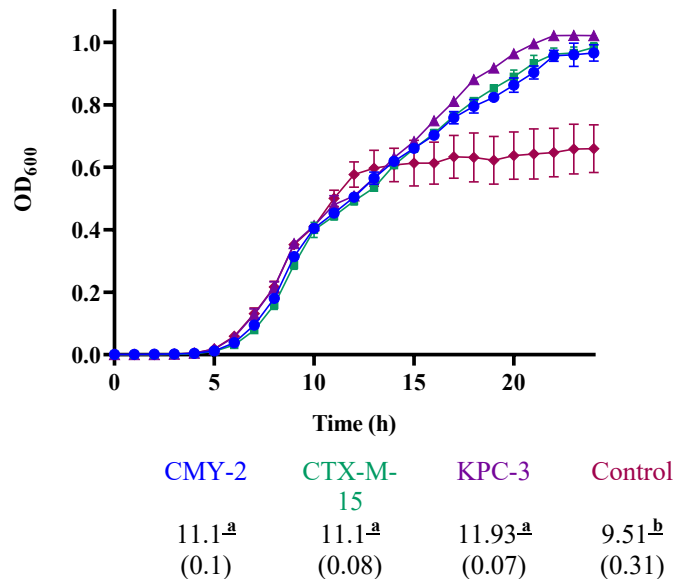

● *bla*<sub>CMY-2</sub>   
 ■ *bla*<sub>CTX-M-15</sub>   
 ▲ *bla*<sub>KPC-3</sub>   
 ◆ pMMB207 $\Delta$ *bla*<sub>Tem-1</sub> (control)

E) 8 µg/ml ceftiofur added at 5 hours

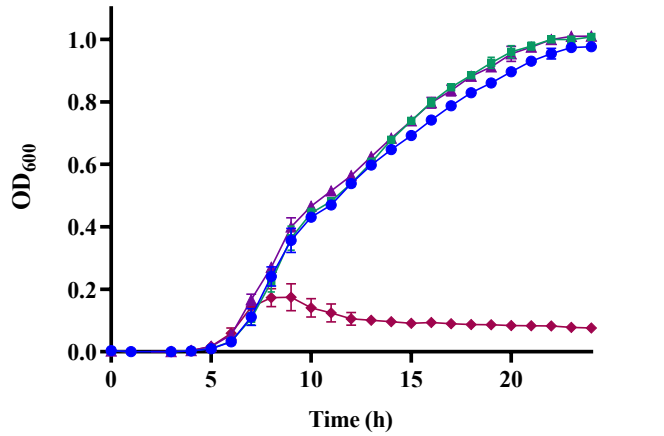

|                     | CMY-2                      | CTX-M-15                     | KPC-3                       | Control                    |
|---------------------|----------------------------|------------------------------|-----------------------------|----------------------------|
| $\bar{x}$ AUC (SEM) | 11.6 <sup>a</sup><br>(0.1) | 12.12 <sup>a</sup><br>(0.09) | 12.37 <sup>a</sup><br>(0.1) | 1.95 <sup>b</sup><br>(0.1) |

F) 8 µg/ml ceftiofur added at 8 hours

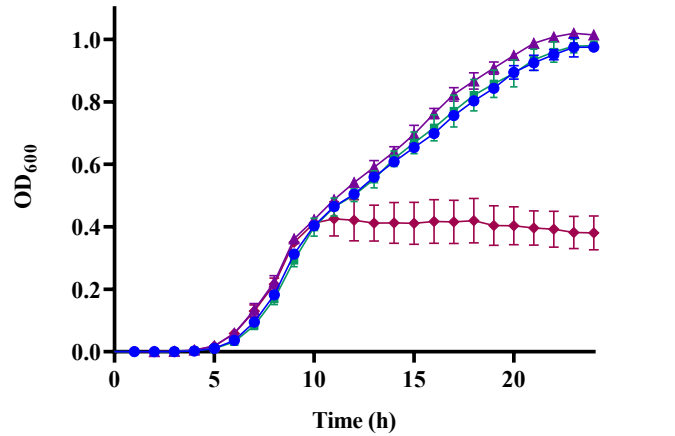

|                     | CMY-2                      | CTX-M-15                     | KPC-3                       | Control                     |
|---------------------|----------------------------|------------------------------|-----------------------------|-----------------------------|
| $\bar{x}$ AUC (SEM) | 11.2 <sup>a</sup><br>(0.1) | 11.21 <sup>a</sup><br>(0.17) | 12.01 <sup>a</sup><br>(0.1) | 6.69 <sup>b</sup><br>(0.28) |

G) 16 µg/ml ceftiofur added at 5 hours

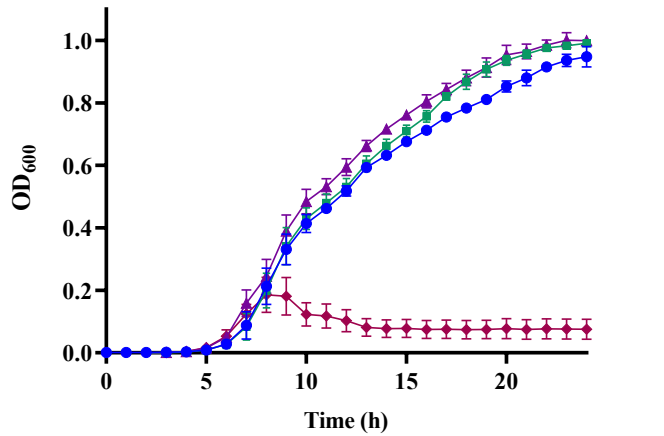

|                     | CMY-2                       | CTX-M-15                    | KPC-3                        | Control                     |
|---------------------|-----------------------------|-----------------------------|------------------------------|-----------------------------|
| $\bar{x}$ AUC (SEM) | 11.1 <sup>a</sup><br>(0.14) | 11.8 <sup>a</sup><br>(0.15) | 12.46 <sup>a</sup><br>(0.15) | 1.78 <sup>b</sup><br>(0.19) |

H) 16 µg/ml ceftiofur added at 8 hours

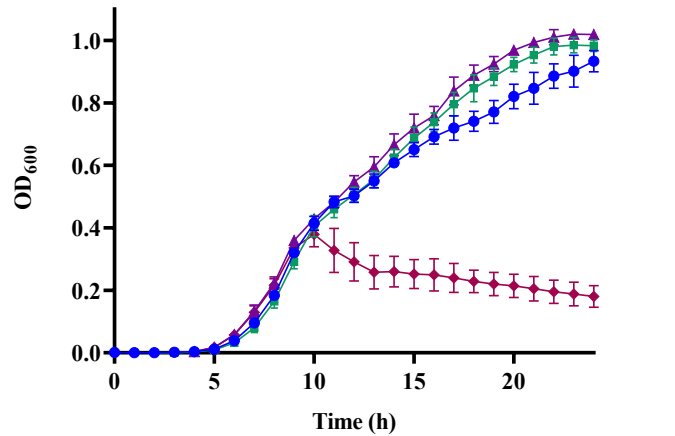

|                     | CMY-2                        | CTX-M-15                     | KPC-3                        | Control                     |
|---------------------|------------------------------|------------------------------|------------------------------|-----------------------------|
| $\bar{x}$ AUC (SEM) | 10.71 <sup>a</sup><br>(0.16) | 11.42 <sup>a</sup><br>(0.15) | 12.15 <sup>a</sup><br>(0.13) | 4.36 <sup>b</sup><br>(0.22) |

● *bla*<sub>CMY-2</sub>   
 ■ *bla*<sub>CTX-M-15</sub>   
 ▲ *bla*<sub>KPC-3</sub>   
 ◆ pMMB207Δ*bla*<sub>Tem-1</sub> (control)



I) 32 µg/ml ceftiofur added at 5 hours

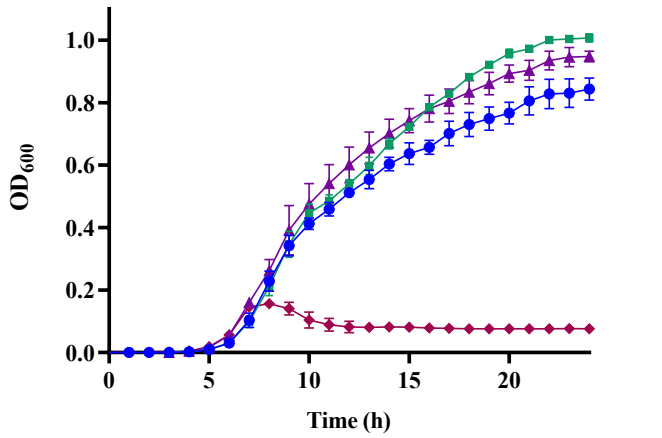

|               | CMY-2              | CTX-M-15           | KPC-3              | Control           |
|---------------|--------------------|--------------------|--------------------|-------------------|
| $\bar{x}$ AUC | 10.38 <sup>a</sup> | 12.02 <sup>a</sup> | 12.04 <sup>a</sup> | 1.69 <sup>b</sup> |
| (SEM)         | (0.17)             | (0.1)              | (0.23)             | (0.1)             |

J) 32 µg/ml ceftiofur added at 8 hours

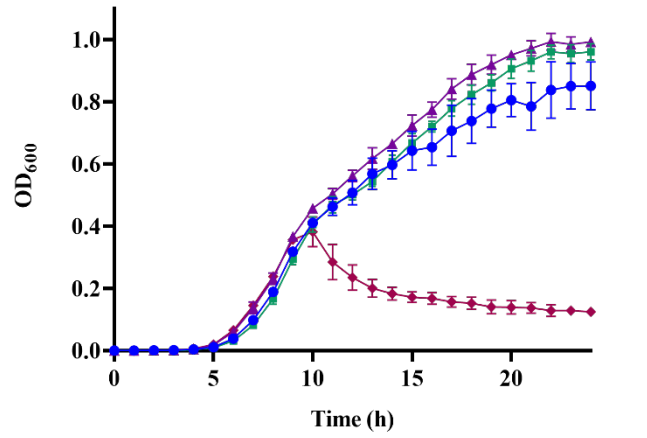

|               | CMY-2              | CTX-M-15           | KPC-3              | Control          |
|---------------|--------------------|--------------------|--------------------|------------------|
| $\bar{x}$ AUC | 10.43 <sup>a</sup> | 11.19 <sup>a</sup> | 12.17 <sup>a</sup> | 3.5 <sup>b</sup> |
| (SEM)         | (0.23)             | (0.12)             | (0.12)             | (0.13)           |

K) 64 µg/ml ceftiofur added at 5 hours

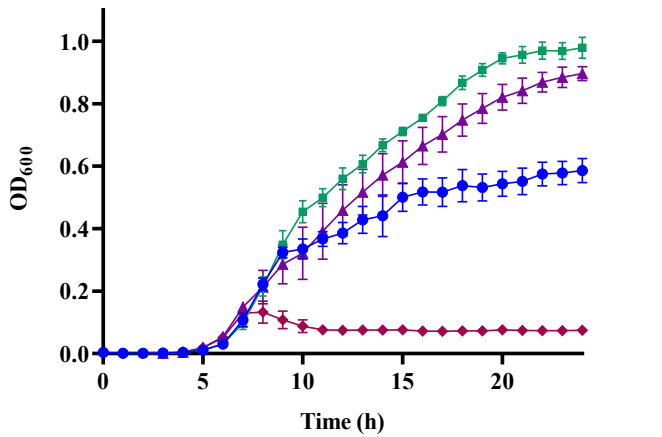

|               | CMY-2             | CTX-M-15           | KPC-3              | Control           |
|---------------|-------------------|--------------------|--------------------|-------------------|
| $\bar{x}$ AUC | 7.81 <sup>a</sup> | 11.87 <sup>b</sup> | 10.36 <sup>c</sup> | 1.56 <sup>d</sup> |
| (SEM)         | (0.2)             | (0.14)             | (0.30)             | (0.07)            |

L) 64 µg/ml ceftiofur added at 8 hours

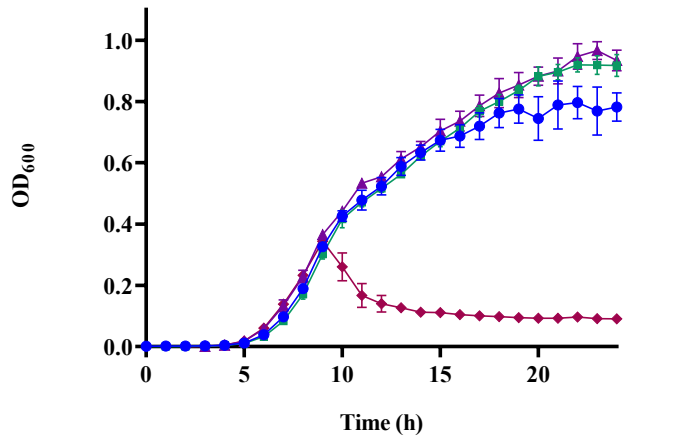

|               | CMY-2              | CTX-M-15           | KPC-3              | Control           |
|---------------|--------------------|--------------------|--------------------|-------------------|
| $\bar{x}$ AUC | 10.43 <sup>a</sup> | 11.05 <sup>a</sup> | 11.67 <sup>a</sup> | 2.53 <sup>b</sup> |
| (SEM)         | (0.23)             | (0.11)             | (0.16)             | (0.1)             |

● *bla*<sub>CMY-2</sub>   
 ■ *bla*<sub>CTX-M-15</sub>   
 ▲ *bla*<sub>KPC-3</sub>   
 ◆ pMMB207Δ*bla*<sub>Tem-1</sub> (control)

**K) 128 µg/ml ceftiofur added at 5 hours**

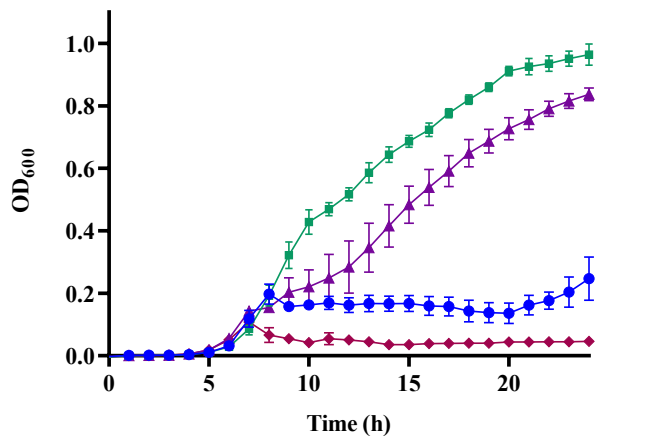

|               | CMY-2             | CTX-M-15           | KPC-3             | Control           |
|---------------|-------------------|--------------------|-------------------|-------------------|
| $\bar{x}$ AUC | 2.92 <sup>a</sup> | 11.36 <sup>b</sup> | 8.56 <sup>c</sup> | 0.93 <sup>d</sup> |
| (SEM)         | (0.16)            | (0.13)             | (0.26)            | (0.1)             |

**L) 128 µg/ml ceftiofur added at 8 hours**

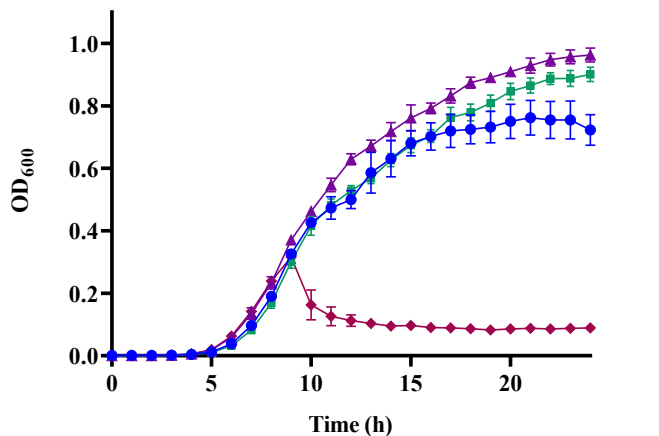

|               | CMY-2              | CTX-M-15           | KPC-3              | Control           |
|---------------|--------------------|--------------------|--------------------|-------------------|
| $\bar{x}$ AUC | 10.23 <sup>a</sup> | 10.88 <sup>a</sup> | 12.22 <sup>b</sup> | 2.22 <sup>c</sup> |
| (SEM)         | (0.23)             | (0.12)             | (0.11)             | (0.1)             |

**K) 256 µg/ml ceftiofur added at 5 hours**

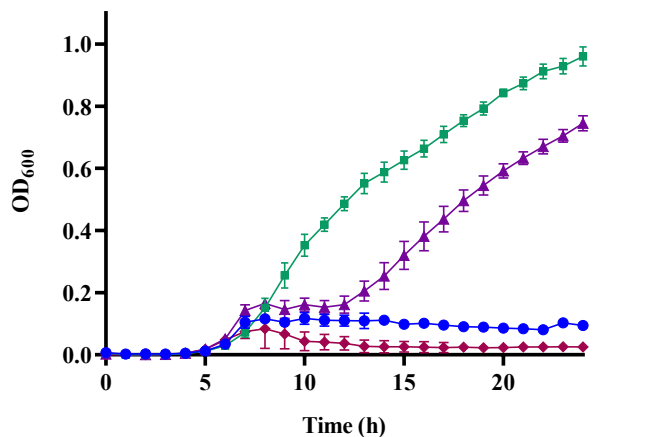

|               | CMY-2             | CTX-M-15          | KPC-3             | Control          |
|---------------|-------------------|-------------------|-------------------|------------------|
| $\bar{x}$ AUC | 1.82 <sup>a</sup> | 10.5 <sup>b</sup> | 6.61 <sup>c</sup> | 0.7 <sup>d</sup> |
| (SEM)         | (0.1)             | (0.14)            | (0.16)            | (0.13)           |

**L) 256 µg/ml ceftiofur added at 8 hours**

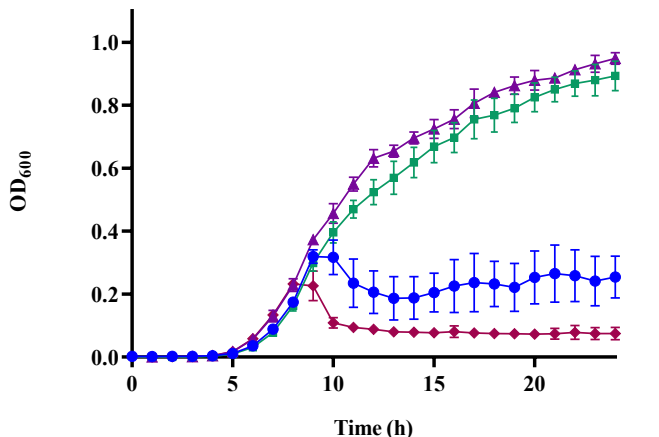

|               | CMY-2             | CTX-M-15           | KPC-3              | Control           |
|---------------|-------------------|--------------------|--------------------|-------------------|
| $\bar{x}$ AUC | 4.04 <sup>a</sup> | 10.71 <sup>b</sup> | 11.87 <sup>c</sup> | 1.85 <sup>d</sup> |
| (SEM)         | (0.35)            | (0.22)             | (0.13)             | (0.1)             |

● *bla<sub>CMY-2</sub>*   
 ■ *bla<sub>CTX-M-15</sub>*   
 ▲ *bla<sub>KPC-3</sub>*   
 ◆ pMMB207Δ*bla<sub>Tem-1</sub>* (control)
